# Supplementary material for: The synthesis and structures of 1,1′-bis(sulfonyl)ferrocene derivatives
Source: Royal Society of Chemistry journal article supplement (doi:10.1039/c6dt02669a), 2016-01-01
Supplement: c6dt02669a1.pdf [file c6dt02669a1.pdf]

# The Synthesis and Structures of 1,1'- Bis(sulfonyl)ferrocene Derivatives

Kullapa Chanawanno,<sup>a</sup> Cole Holstrom,<sup>b</sup> Laura A. Crandall,<sup>c</sup> Henry Dodge,<sup>d</sup> Victor N. Nemykin,<sup>b</sup> Richard S. Herrick<sup>d</sup> and Christopher J. Ziegler\*<sup>c</sup>

a. Department of Chemistry, Faculty of Science, Chiang Mai University, Chiang Mai 50200 (Thailand).

b. Department of Chemistry & Biochemistry University of Minnesota – Duluth 1039 University Drive, Duluth, MN 55812 (USA).

c. Department of Chemistry, University of Akron, Akron, Ohio 44312-3601 (USA).  
Email: ziegler@uakron.edu

d. Department of Chemistry, College of the Holy Cross, 1 College St, Worcester, MA 01610 (USA).

## Supplementary Information

## Table of Contents

|                                                                                  | Page |
|----------------------------------------------------------------------------------|------|
| <b>Figure S1</b> <sup>1</sup> H-NMR of <b>2</b> (300 MHz, DMSO-d <sub>6</sub> )  | 4    |
| <b>Figure S2</b> <sup>1</sup> H-NMR of <b>3</b> (300 MHz, DMSO-d <sub>6</sub> )  | 5    |
| <b>Figure S3</b> <sup>13</sup> C-NMR of <b>3</b> (500 MHz, CDCl <sub>3</sub> )   | 5    |
| <b>Figure S4</b> <sup>1</sup> H-NMR of <b>4</b> (300 MHz, CDCl <sub>3</sub> )    | 6    |
| <b>Figure S5</b> <sup>13</sup> C-NMR of <b>4</b> (500 MHz, CDCl <sub>3</sub> )   | 6    |
| <b>Figure S6</b> <sup>1</sup> H-NMR of <b>5</b> (300 MHz, CDCl <sub>3</sub> )    | 7    |
| <b>Figure S7</b> <sup>13</sup> C-NMR of <b>5</b> (500 MHz, CDCl <sub>3</sub> )   | 7    |
| <b>Figure S8</b> <sup>1</sup> H-NMR of <b>6</b> (300 MHz, CDCl <sub>3</sub> )    | 8    |
| <b>Figure S9</b> <sup>13</sup> C-NMR of <b>6</b> (500 MHz, CDCl <sub>3</sub> )   | 8    |
| <b>Figure S10</b> <sup>1</sup> H-NMR of <b>7</b> (300 MHz, CDCl <sub>3</sub> )   | 9    |
| <b>Figure S11</b> <sup>13</sup> C-NMR of <b>7</b> (500 MHz, CDCl <sub>3</sub> )  | 10   |
| <b>Figure S12</b> <sup>1</sup> H-NMR of <b>8</b> (300 MHz, CDCl <sub>3</sub> )   | 11   |
| <b>Figure S13</b> <sup>13</sup> C-NMR of <b>8</b> (500 MHz, CDCl <sub>3</sub> )  | 11   |
| <b>Figure S14</b> <sup>1</sup> H-NMR of <b>9</b> (300 MHz, CDCl <sub>3</sub> )   | 12   |
| <b>Figure S15</b> <sup>13</sup> C-NMR of <b>9</b> (500 MHz, CDCl <sub>3</sub> )  | 12   |
| <b>Figure S16</b> <sup>1</sup> H-NMR of <b>10</b> (300 MHz, CDCl <sub>3</sub> )  | 13   |
| <b>Figure S17</b> <sup>13</sup> C-NMR of <b>10</b> (500 MHz, CDCl <sub>3</sub> ) | 13   |
| <b>Figure S18</b> <sup>1</sup> H-NMR of <b>11</b> (300 MHz, CDCl <sub>3</sub> )  | 14   |
| <b>Figure S19</b> <sup>13</sup> C-NMR of <b>11</b> (500 MHz, CDCl <sub>3</sub> ) | 15   |
| <b>Figure S20</b> <sup>1</sup> H-NMR of <b>12</b> (300 MHz, CDCl <sub>3</sub> )  | 16   |
| <b>Figure S21</b> <sup>13</sup> C-NMR of <b>12</b> (500 MHz, CDCl <sub>3</sub> ) | 16   |
| <b>Figure S22</b> <sup>1</sup> H-NMR of <b>13</b> (300 MHz, CD <sub>3</sub> OD)  | 17   |
| <b>Figure S23</b> <sup>13</sup> C-NMR of <b>13</b> (500 MHz, CD <sub>3</sub> OD) | 18   |
| <b>Figure S24</b> HRMS ESI of <b>4</b> (top: measured, bottom: calculated)       | 18   |
| <b>Figure S25</b> HRMS ESI of <b>5</b> (top: measured, bottom: calculated)       | 19   |
| <b>Figure S26</b> HRMS ESI of <b>6</b> (top: measured, bottom: calculated)       | 19   |
| <b>Figure S27</b> HRMS ESI of <b>7</b> (top: measured, bottom: calculated)       | 20   |
| <b>Figure S28</b> HRMS ESI of <b>8</b> (top: measured, bottom: calculated)       | 20   |
| <b>Figure S29</b> HRMS ESI of <b>9</b> (top: measured, bottom: calculated)       | 21   |
| <b>Figure S30</b> HRMS ESI of <b>10</b> (top: calculated, bottom: measured)      | 21   |
| <b>Figure S31</b> HRMS ESI of <b>11</b> (top: calculated, bottom: measured)      | 22   |
| <b>Figure S32</b> HRMS ESI of <b>12</b> (top: measured, bottom: calculated)      | 22   |
| <b>Figure S33</b> HRMS ESI of <b>13</b> (top: measured, bottom: calculated)      | 23   |

|                                                                                                                                                       |    |
|-------------------------------------------------------------------------------------------------------------------------------------------------------|----|
| <b>Figure S34</b> Ferrocene geometries of <b>2</b> and <b>3</b>                                                                                       | 23 |
| <b>Figure S35</b> Ferrocene geometries of mono sulfonamides <b>4-7</b>                                                                                | 24 |
| <b>Figure S36</b> Ferrocene geometries of bis sulfonamides <b>8-13</b>                                                                                | 24 |
| <b>Figure S37</b> Packing diagrams with intermolecular hydrogen bonding interactions (blue dash lines) of <b>2</b>                                    | 26 |
| <b>Figure S38</b> Packing diagrams with intermolecular hydrogen bonding interactions (blue dash lines) of <b>4</b>                                    | 27 |
| <b>Figure S39</b> Packing diagrams with intermolecular hydrogen bonding interactions (blue dash lines) of <b>5</b>                                    | 28 |
| <b>Figure S40</b> Packing diagrams with intermolecular hydrogen bonding interactions (blue dash lines) of <b>6</b>                                    | 29 |
| <b>Figure S41</b> Packing diagrams with intermolecular hydrogen bonding interactions (blue dash lines) of <b>7</b>                                    | 30 |
| <b>Figure S42</b> Packing diagrams with intermolecular hydrogen bonding interactions (blue dash lines) of <b>8</b>                                    | 31 |
| <b>Figure S43</b> Packing diagrams with intermolecular hydrogen bonding interactions (blue dash lines) of <b>9</b>                                    | 32 |
| <b>Figure S44</b> Packing diagrams with intermolecular hydrogen bonding interactions (blue dash lines) of <b>10</b>                                   | 33 |
| <b>Figure S45</b> Packing diagrams with intermolecular hydrogen bonding interactions (blue dash lines) of <b>11</b>                                   | 34 |
| <b>Figure S46</b> Packing diagrams with intermolecular hydrogen bonding interactions (blue dash lines) of <b>12</b>                                   | 35 |
| <b>Figure S47</b> Packing diagrams with intermolecular hydrogen bonding interactions (blue dash lines) of <b>13</b>                                   | 36 |
| <b>Figure S48</b> Cyclic voltammograms of compounds <b>3-13</b> in acetonitrile/0.1 M tetra-n-butylammonium hexafluorophosphate (TBAPF <sub>6</sub> ) | 38 |
| <b>Table S1</b> Crystal data and refinement parameters of compounds <b>2-13</b>                                                                       | 25 |
| <b>Table S2</b> Electrochemical data for compounds <b>3-13</b>                                                                                        | 38 |

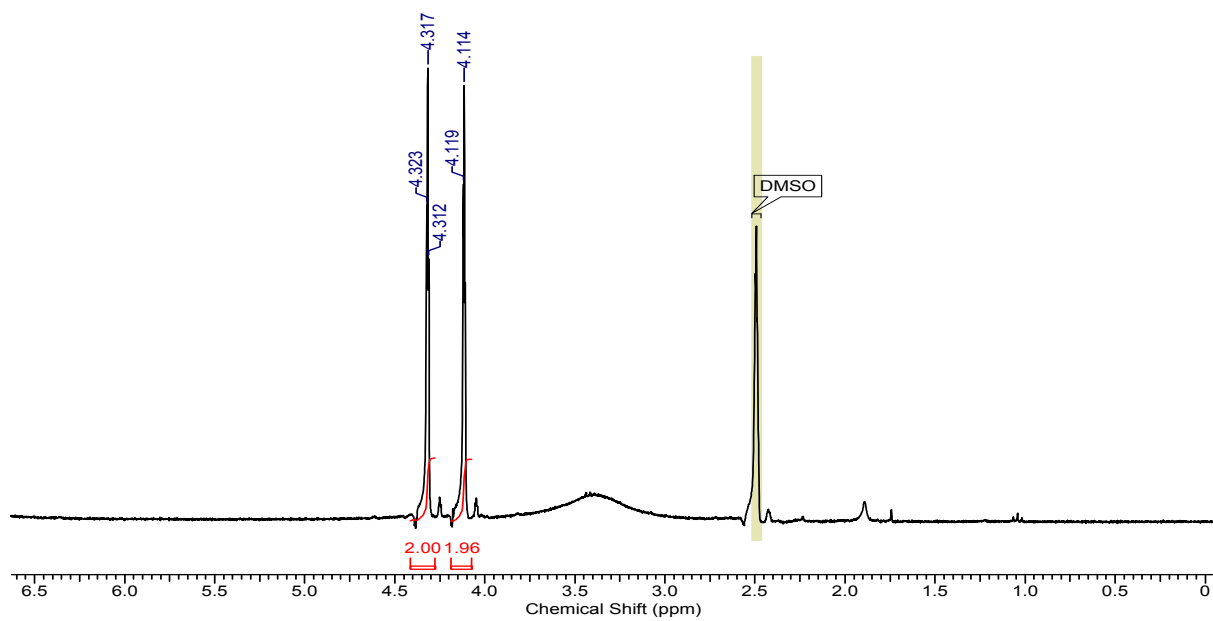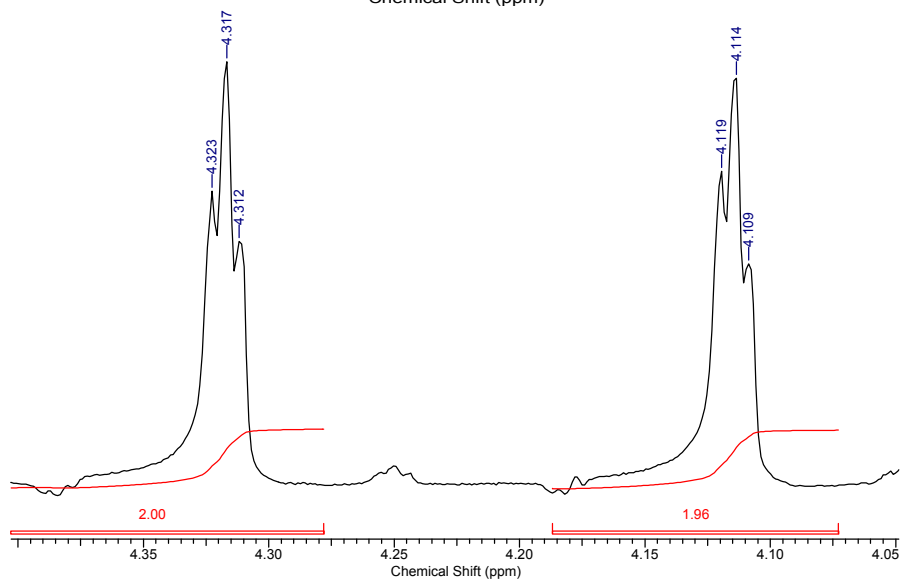

**Figure S1** <sup>1</sup>H-NMR of **2** (300 MHz, DMSO-d<sub>6</sub>)

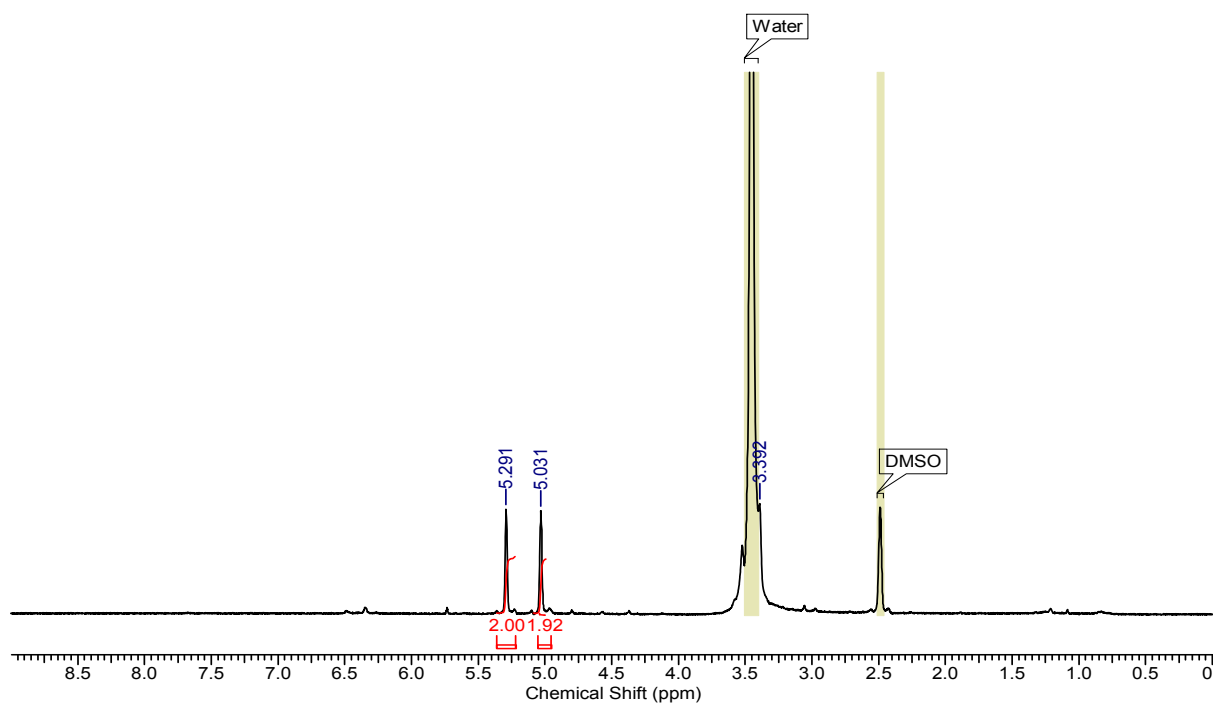

**Figure S2**  $^1\text{H-NMR}$  of **3** (300 MHz,  $\text{DMSO-d}_6$ )

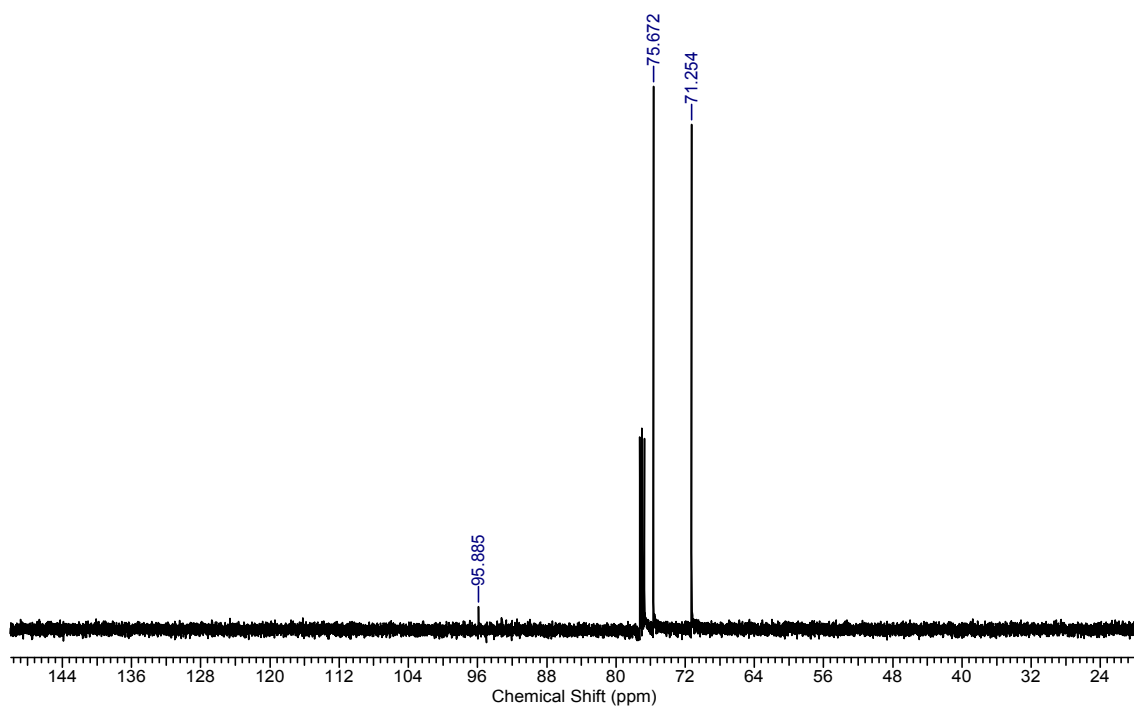

**Figure S3**  $^{13}\text{C-NMR}$  of **3** (500 MHz,  $\text{CDCl}_3$ )

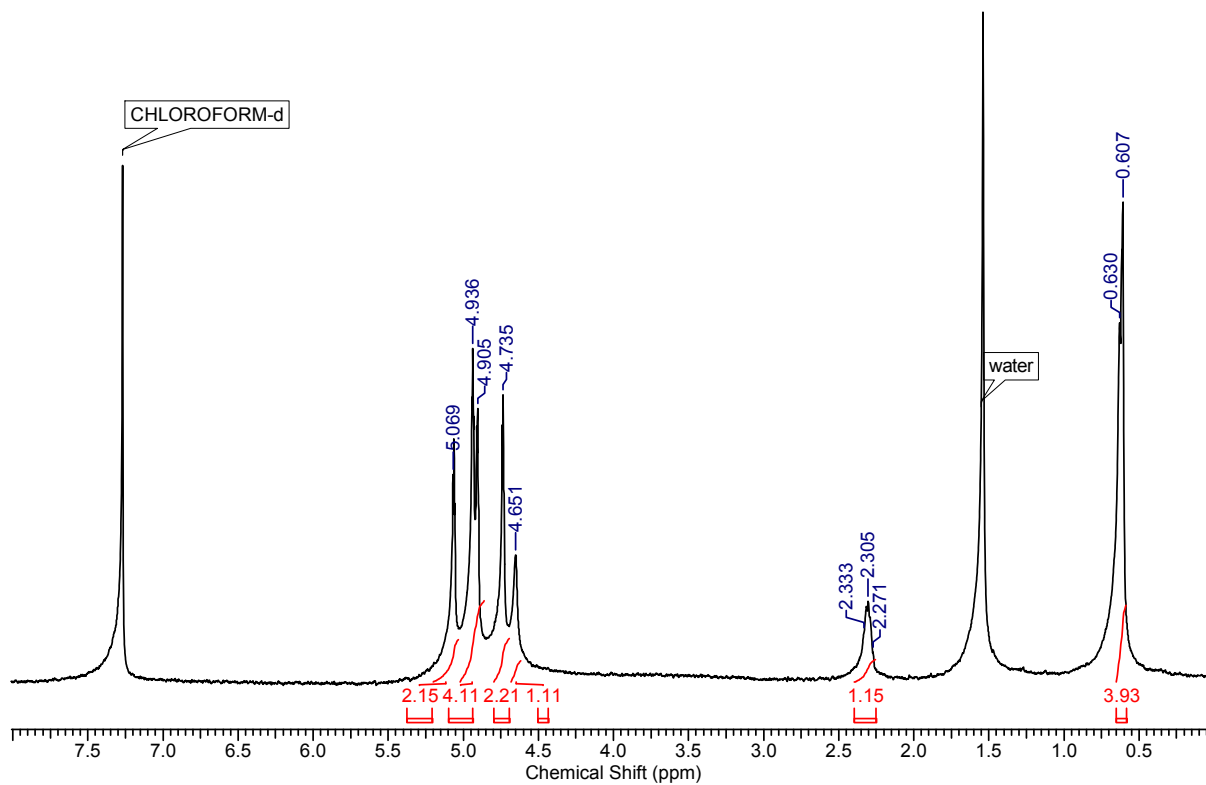

Figure S4  $^1\text{H-NMR}$  of **4** (300 MHz,  $\text{CDCl}_3$ )

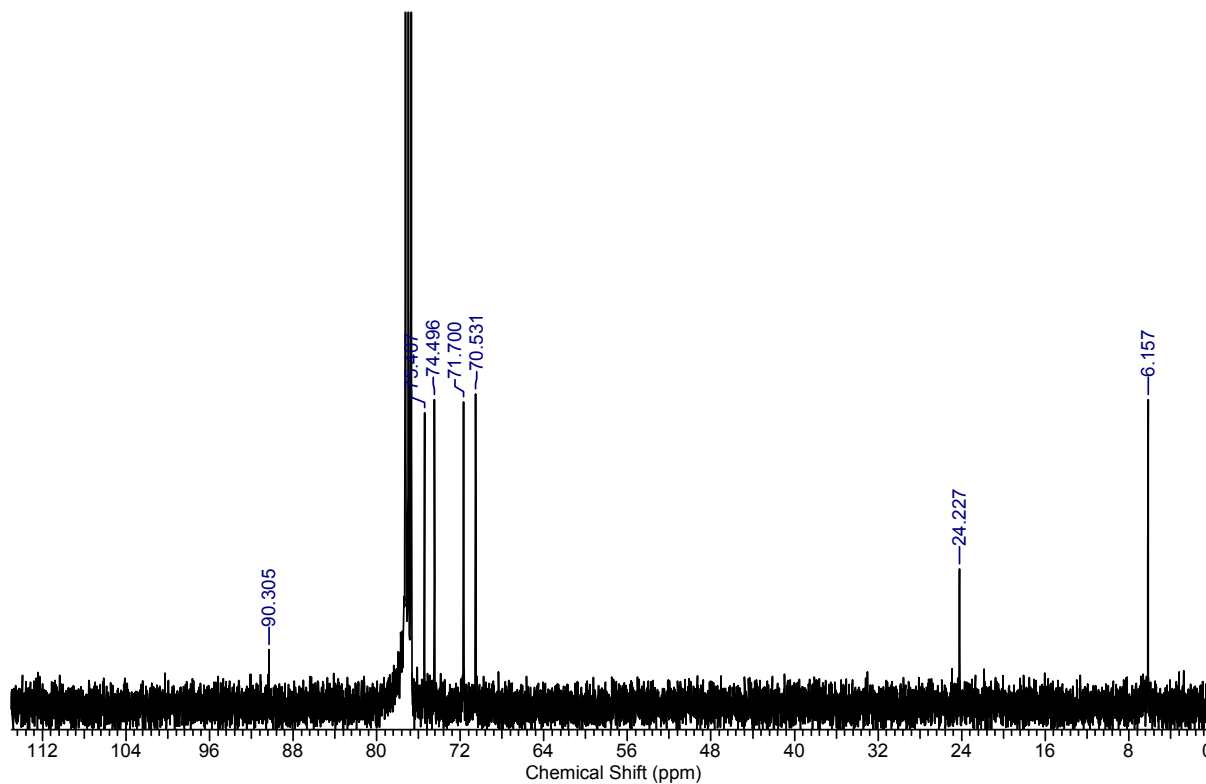

Figure S5  $^{13}\text{C-NMR}$  of **4** (500 MHz,  $\text{CDCl}_3$ )

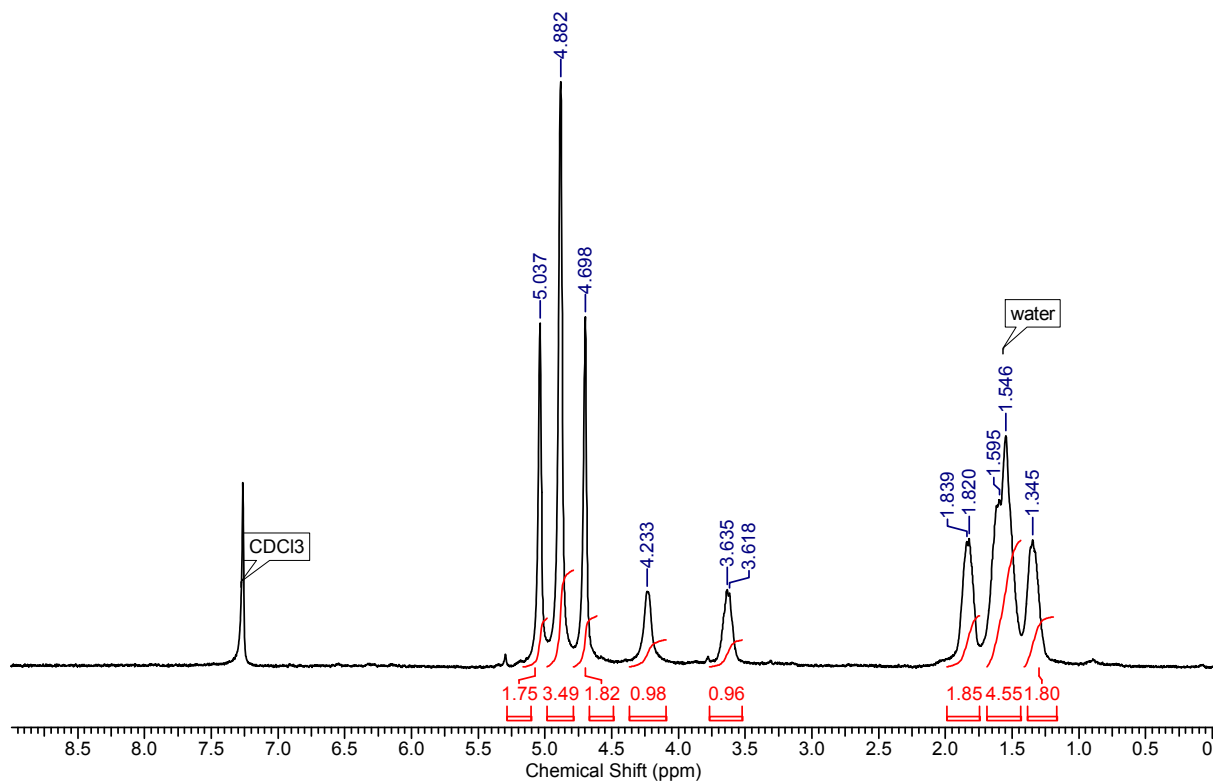

Figure S6  $^1\text{H}$ -NMR of **5** (300 MHz,  $\text{CDCl}_3$ )

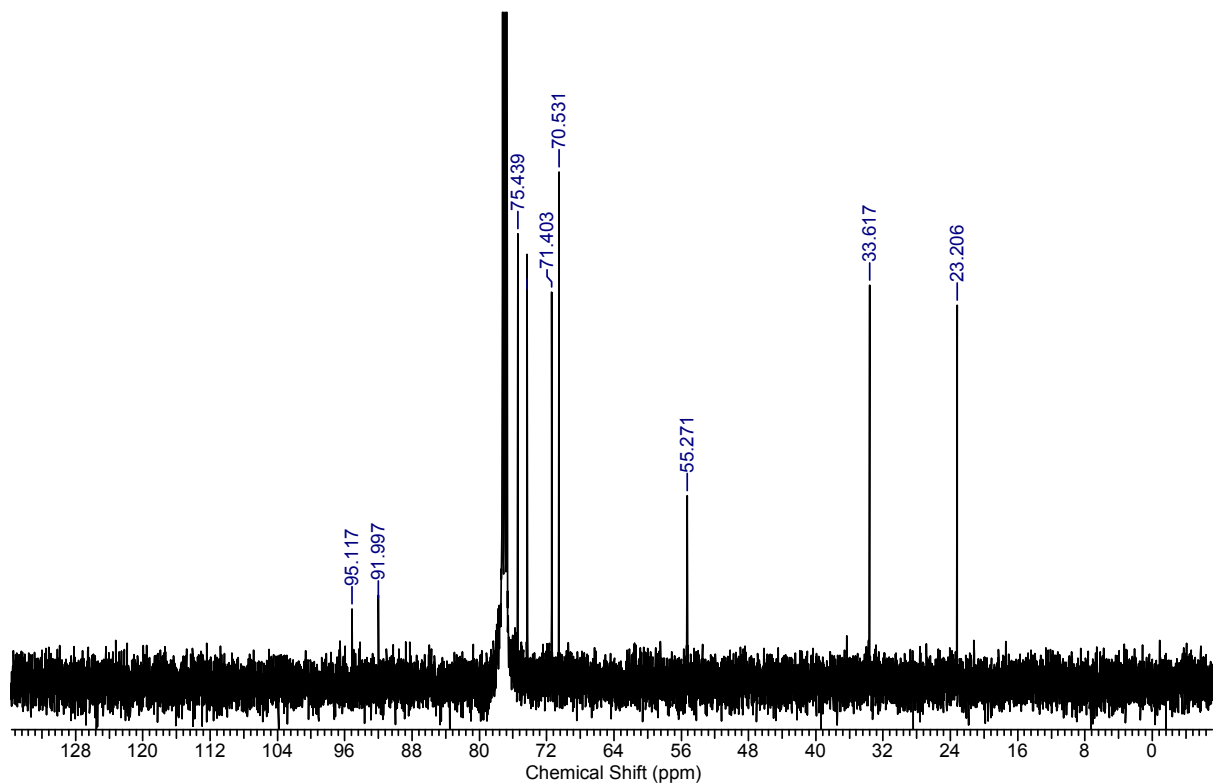

Figure S7  $^{13}\text{C}$ -NMR of **5** (500 MHz,  $\text{CDCl}_3$ )

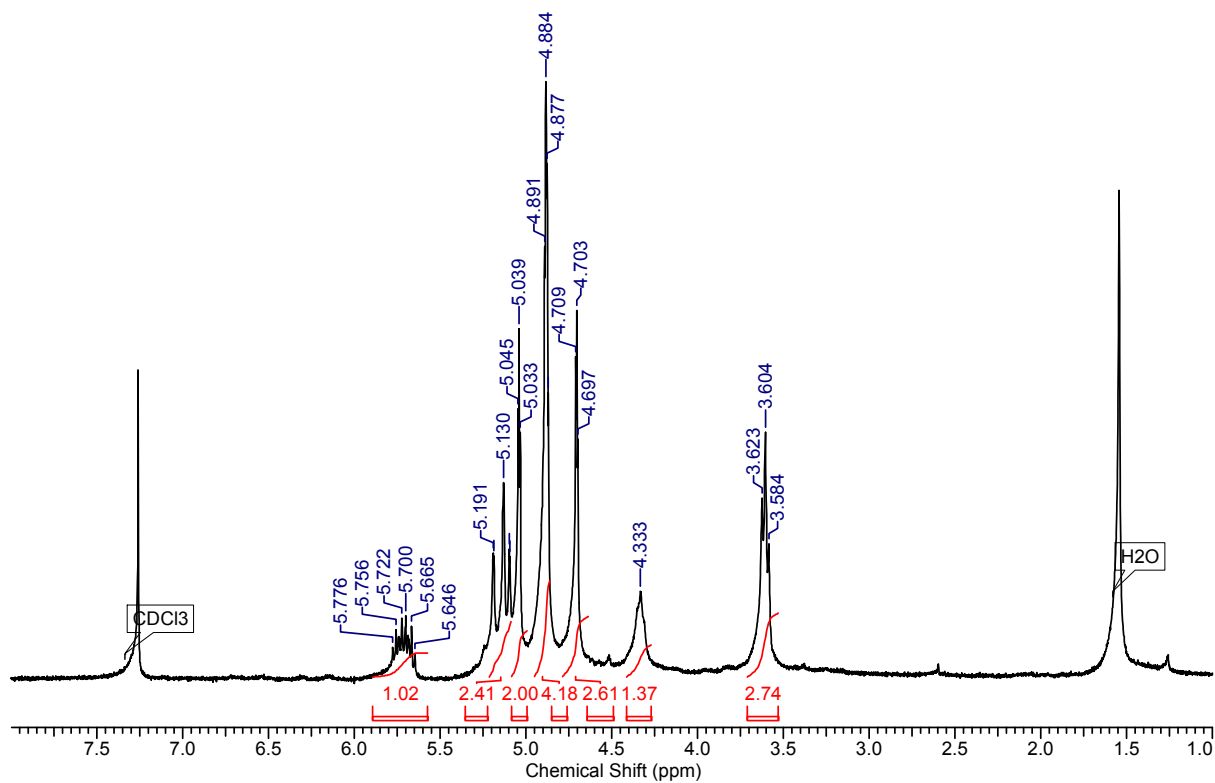

Figure S8 <sup>1</sup>H-NMR of **6** (300 MHz, CDCl<sub>3</sub>)

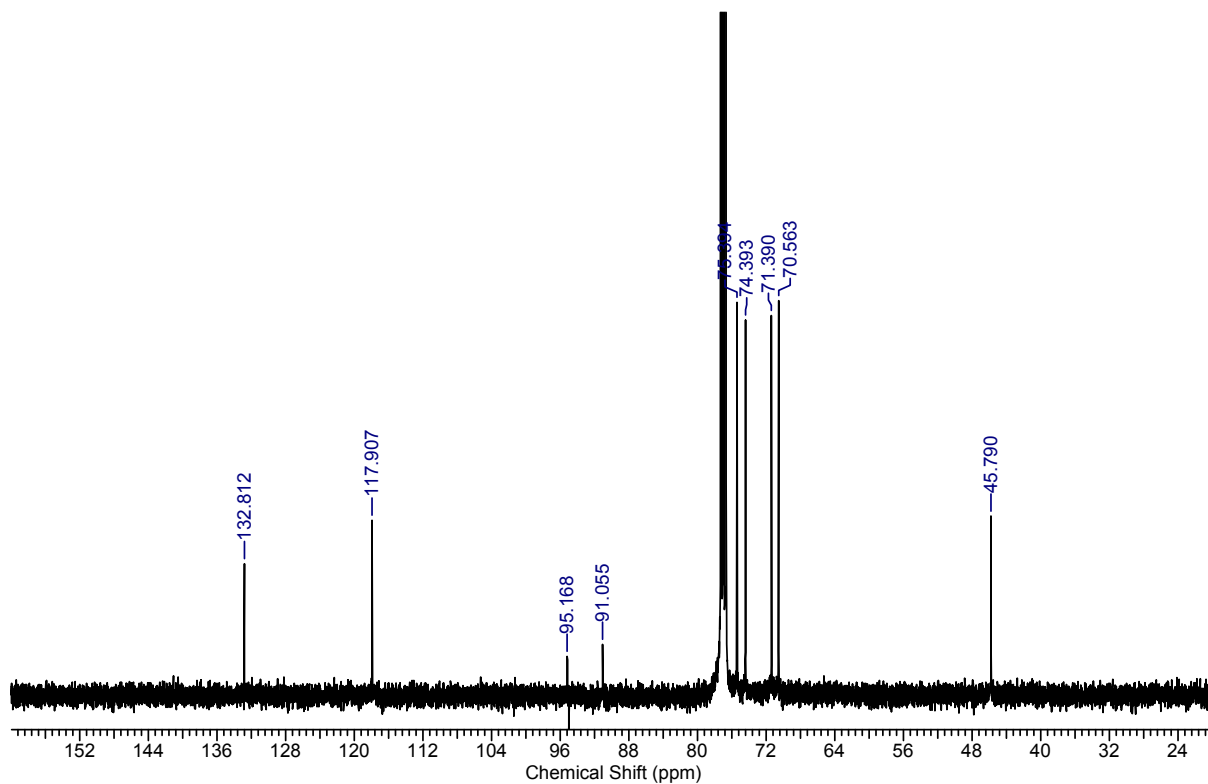

Figure S9 <sup>13</sup>C-NMR of **6** (500 MHz, CDCl<sub>3</sub>)



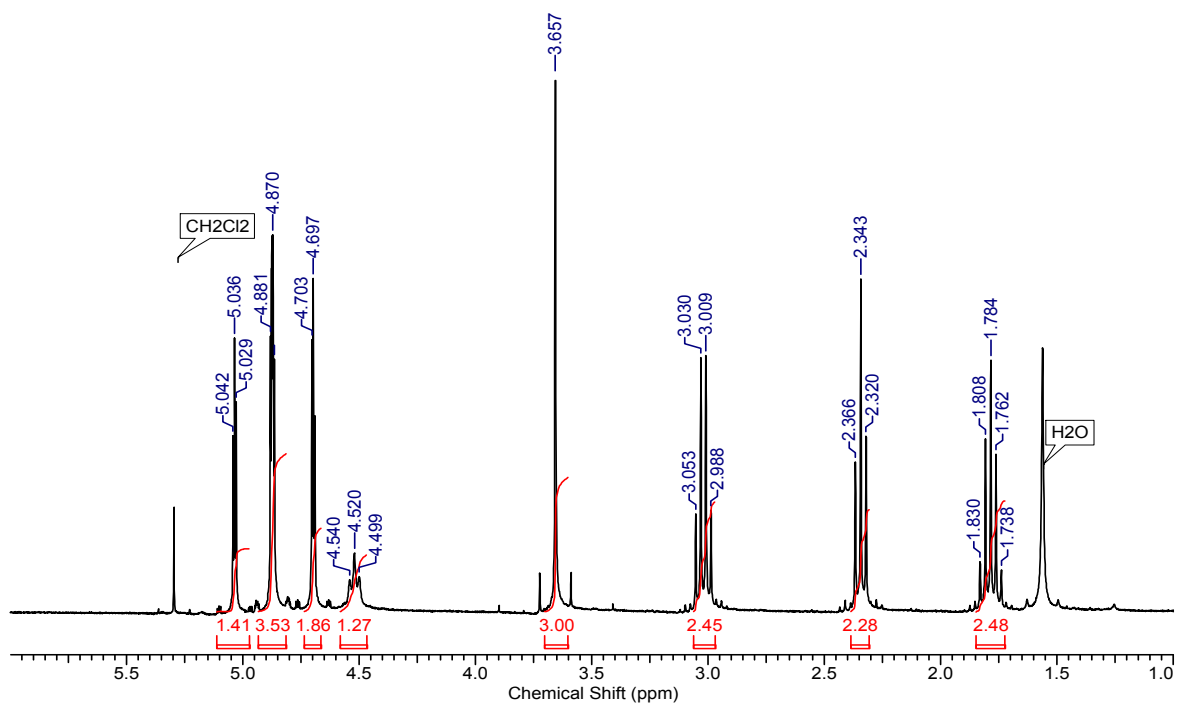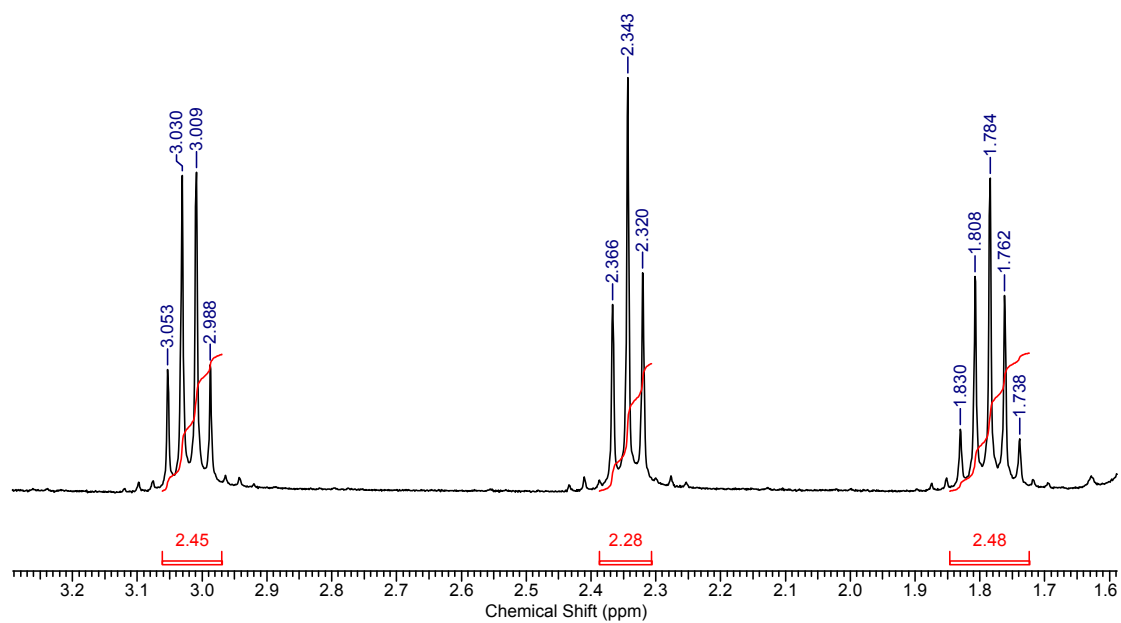

**Figure S10** <sup>1</sup>H-NMR of 7 (300 MHz, CDCl<sub>3</sub>)

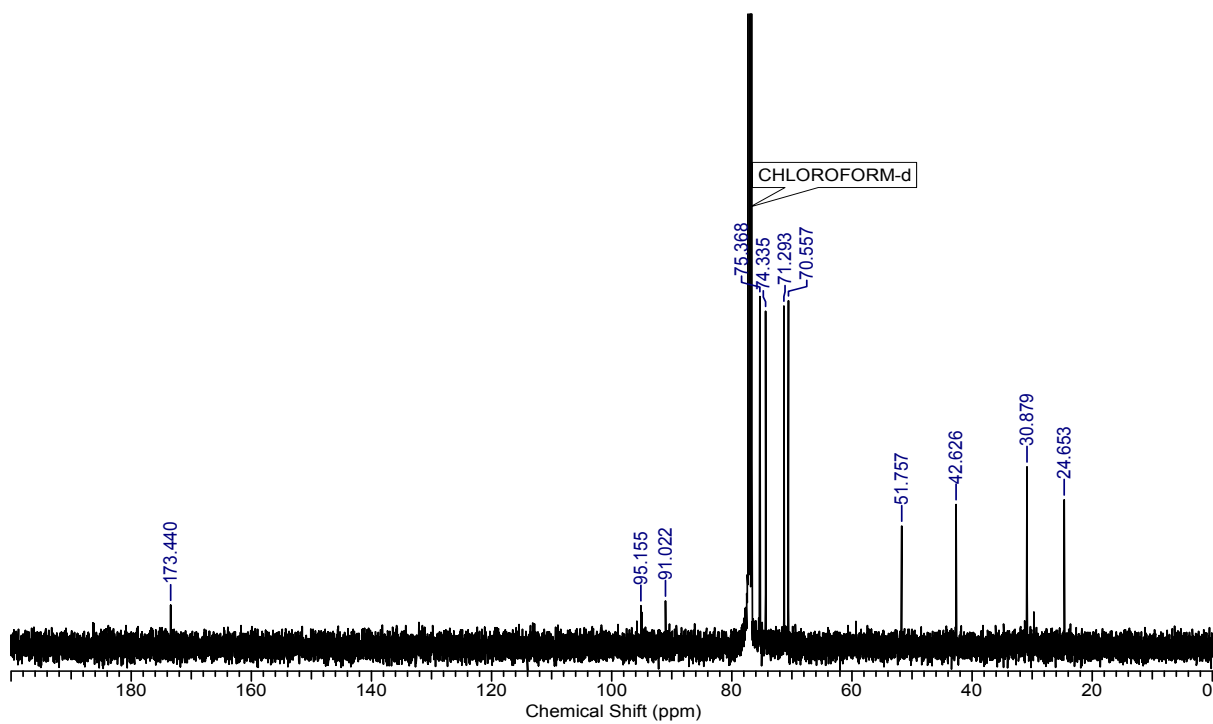

**Figure S11**  $^{13}\text{C}$ -NMR of 7 (500 MHz,  $\text{CDCl}_3$ )

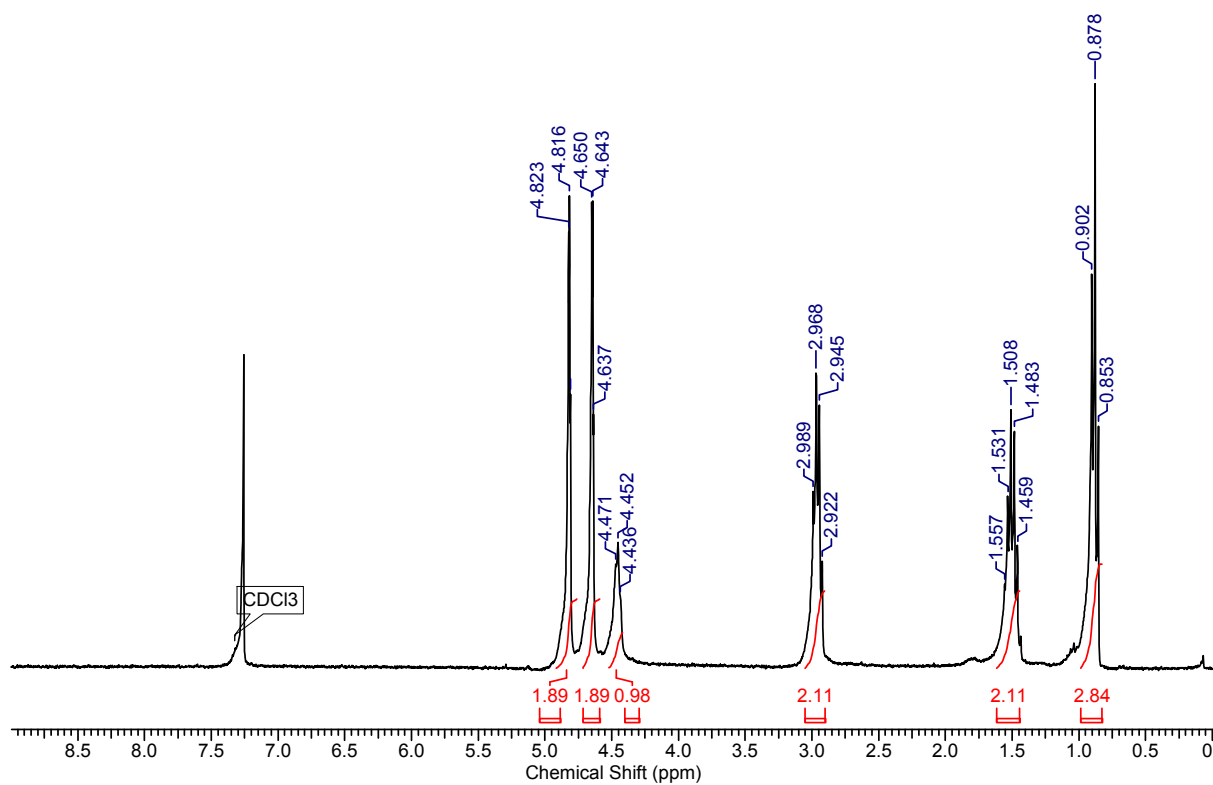

Figure S12  $^1\text{H-NMR}$  of **8** (300 MHz,  $\text{CDCl}_3$ )

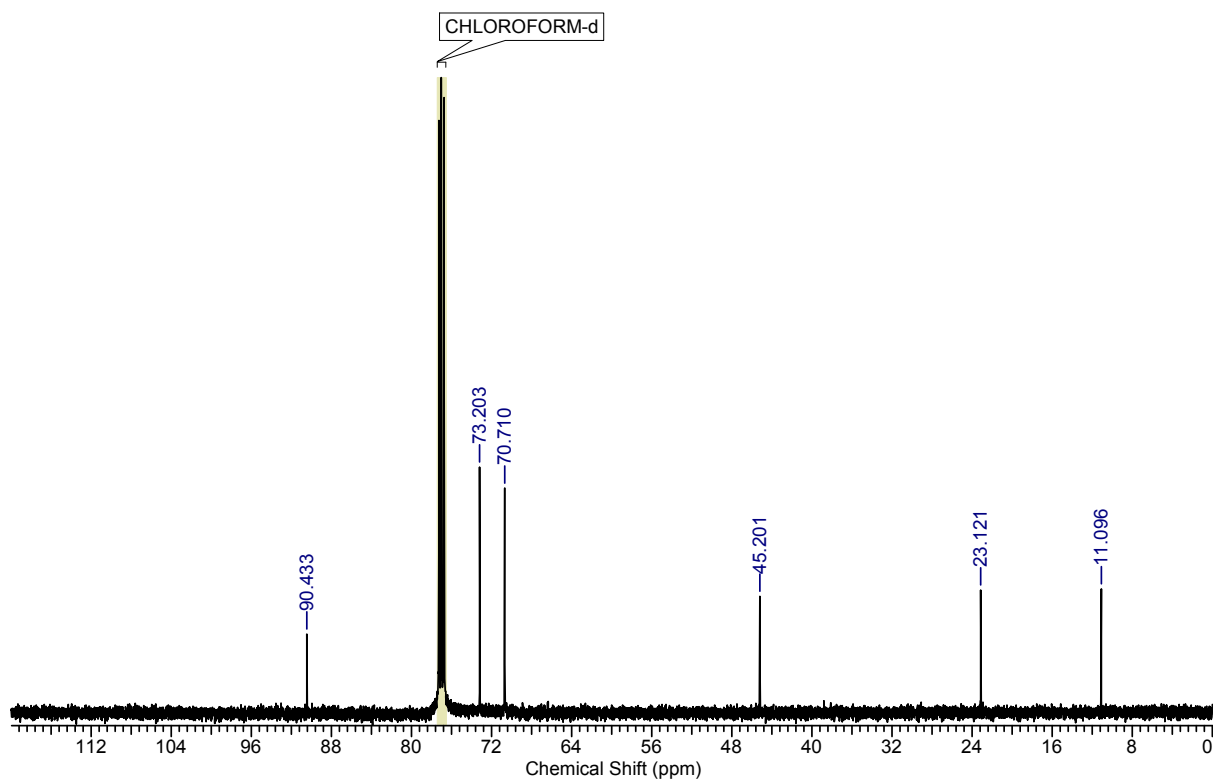

Figure S13  $^{13}\text{C-NMR}$  of **8** (500 MHz,  $\text{CDCl}_3$ )

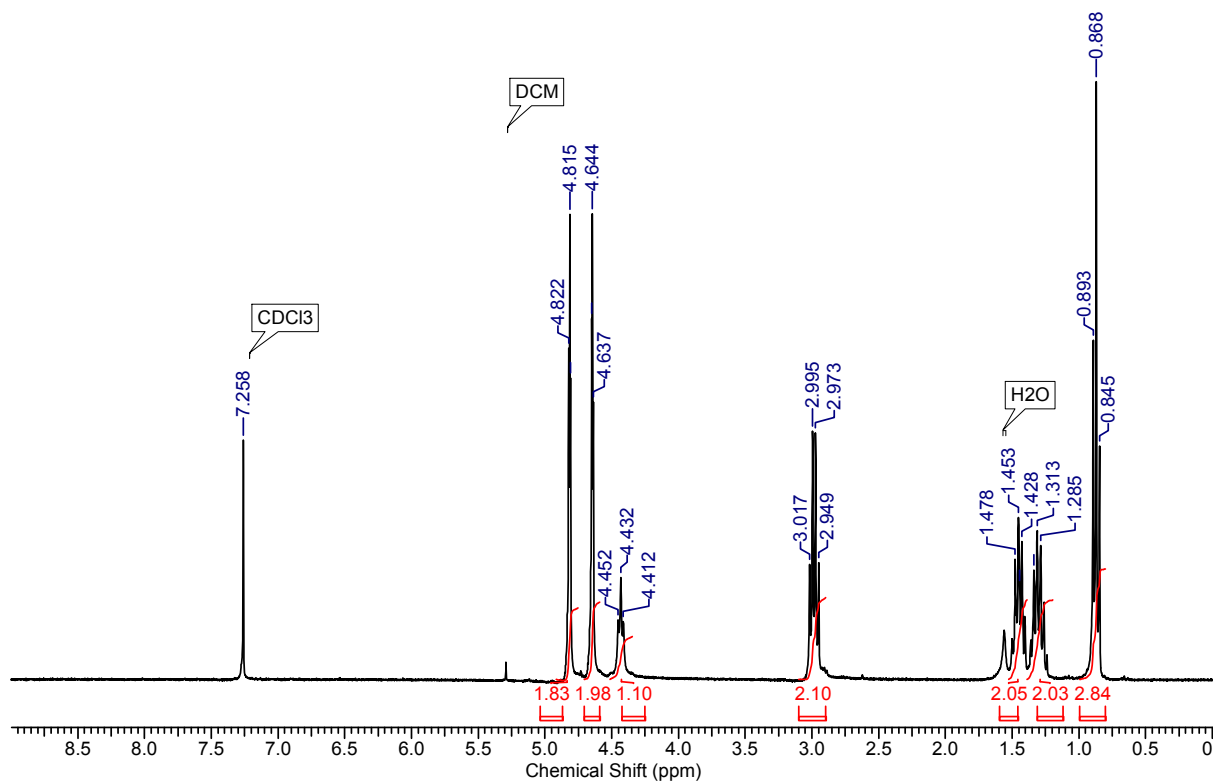

Figure S14  $^1\text{H-NMR}$  of **9** (300 MHz,  $\text{CDCl}_3$ )

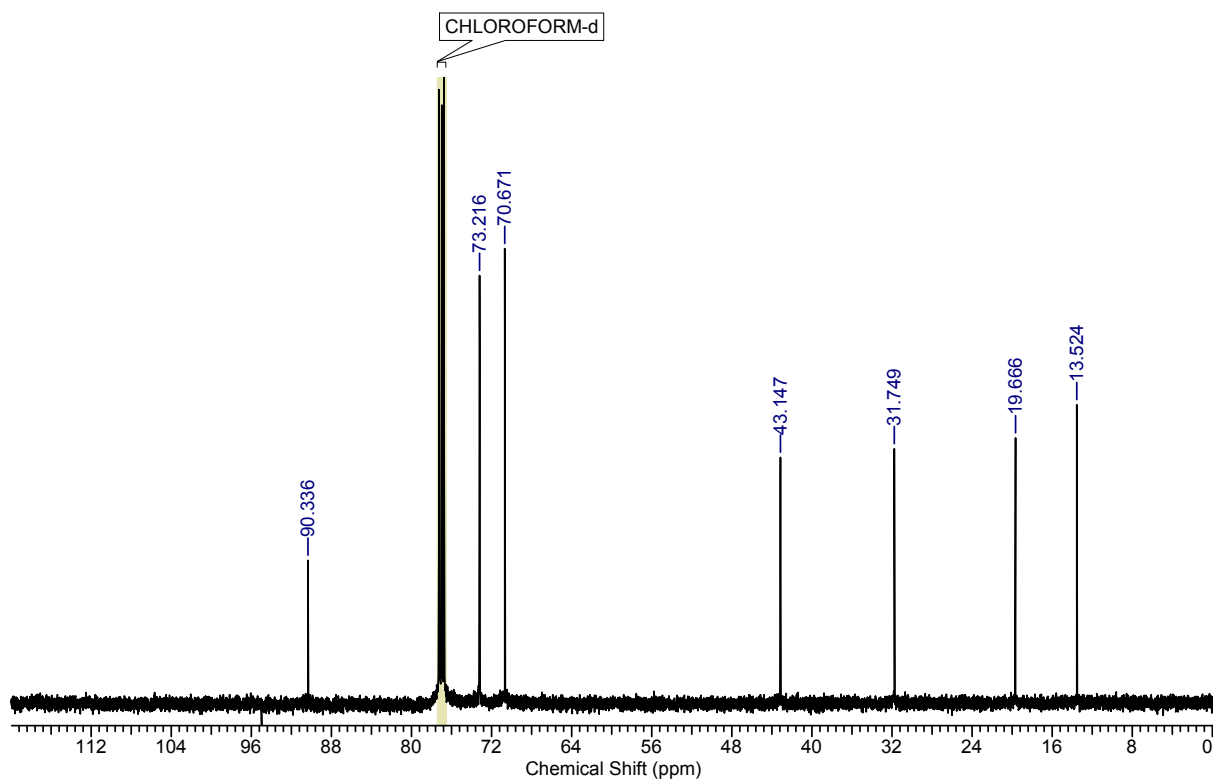

Figure S15  $^{13}\text{C-NMR}$  of **9** (500 MHz,  $\text{CDCl}_3$ )

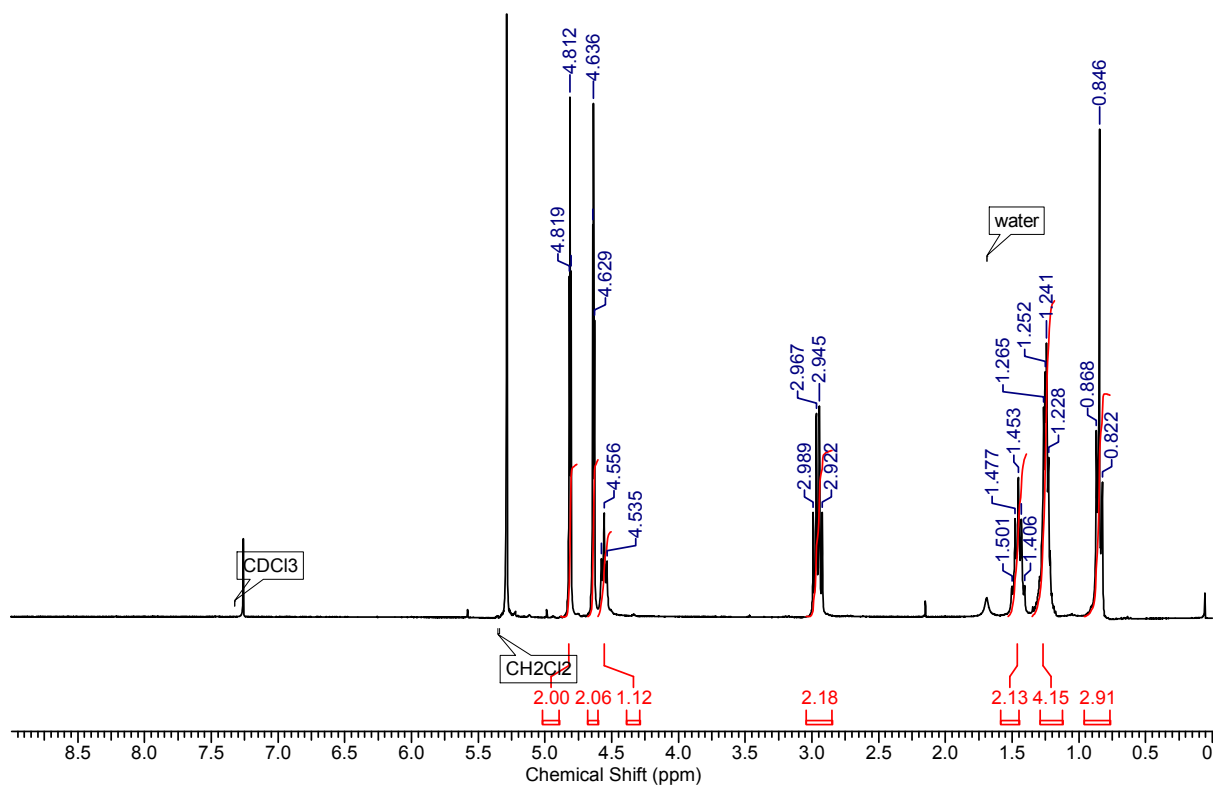

Figure S16 <sup>1</sup>H-NMR of **10** (300 MHz, CDCl<sub>3</sub>)

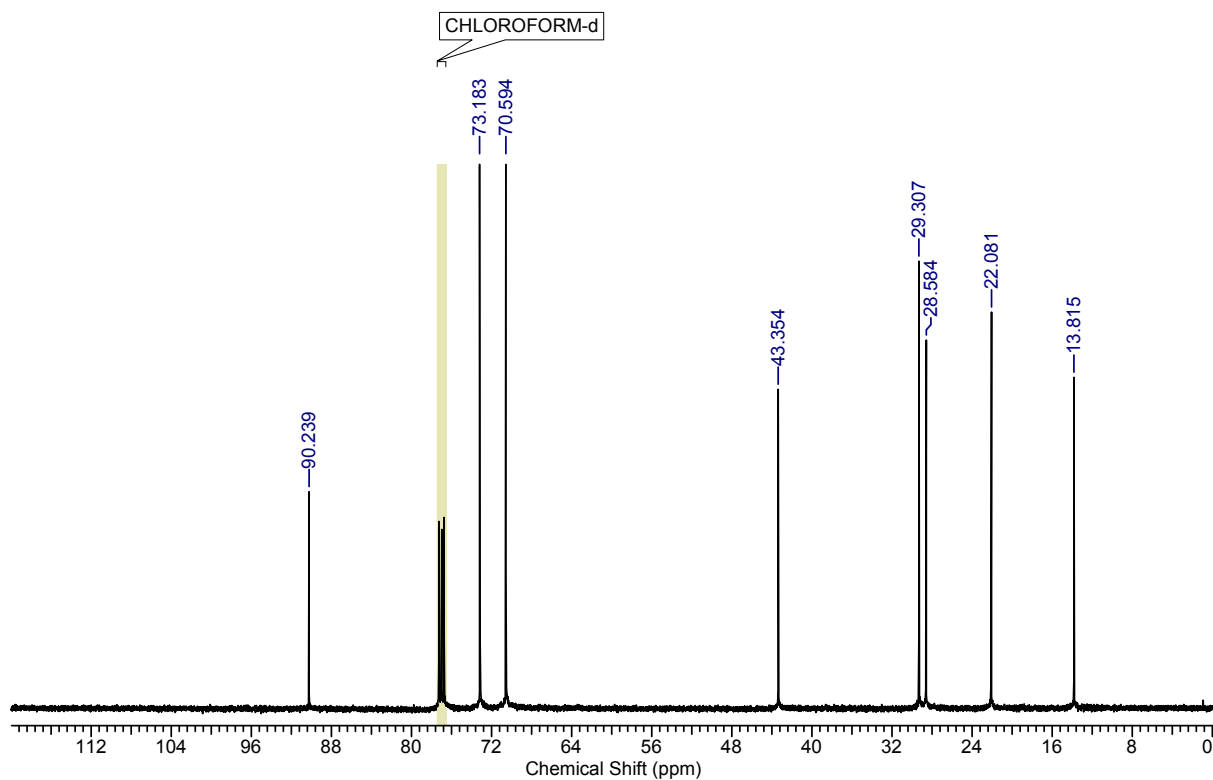

Figure S17 <sup>13</sup>C-NMR of **10** (500 MHz, CDCl<sub>3</sub>)

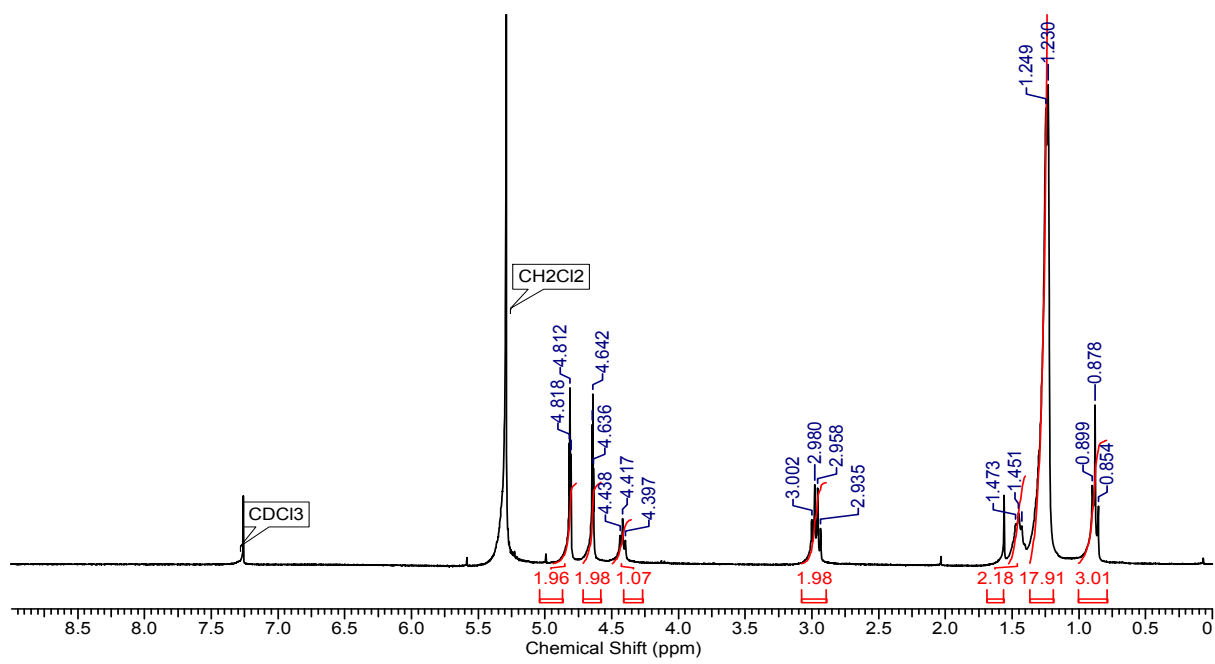

**Figure S18**  $^1\text{H-NMR}$  of **11** (300 MHz,  $\text{CDCl}_3$ )

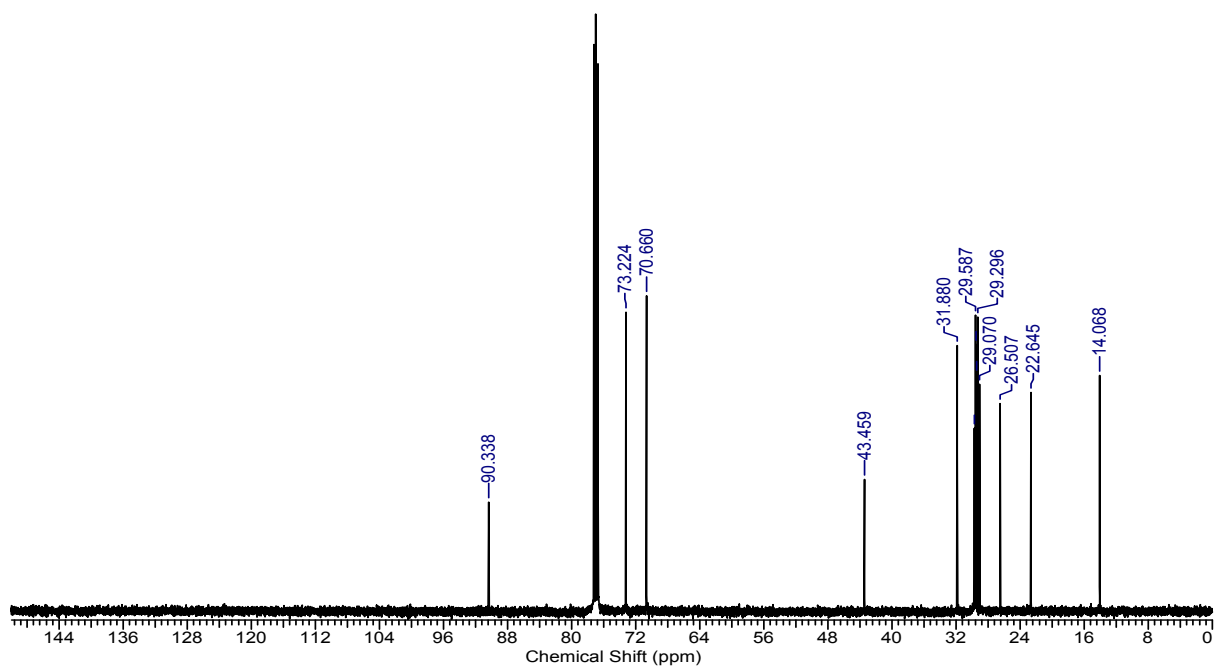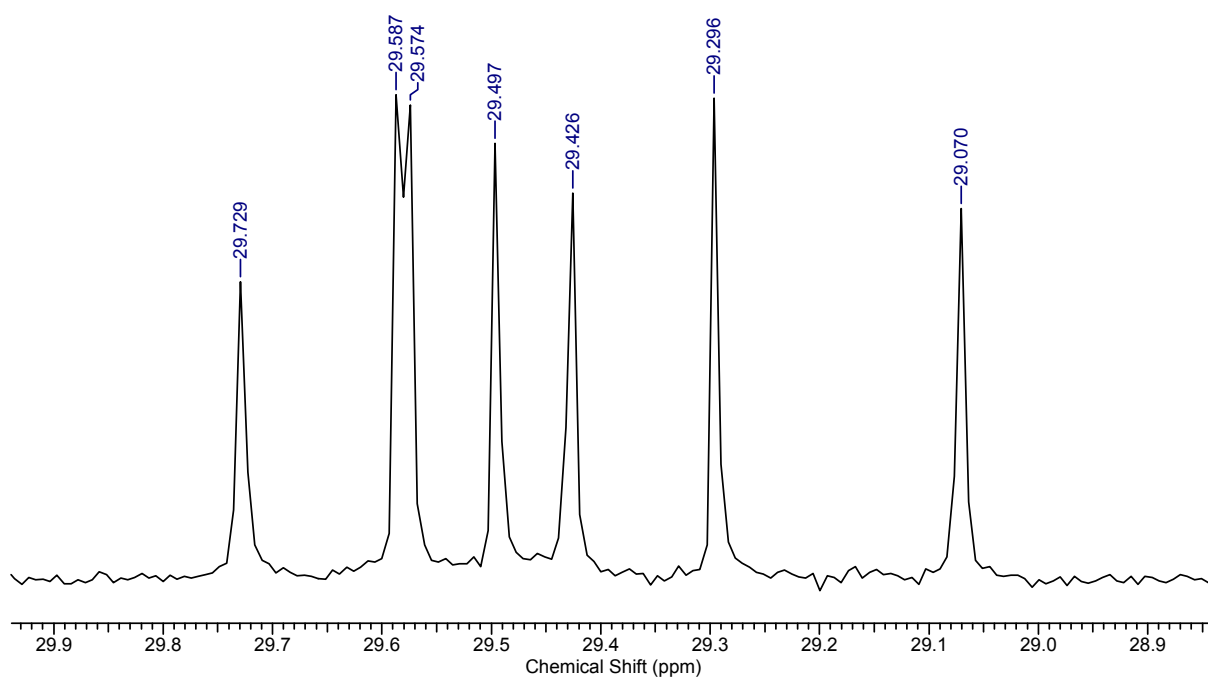

**Figure S19**  $^{13}\text{C}$ -NMR of **11** (500 MHz,  $\text{CDCl}_3$ )

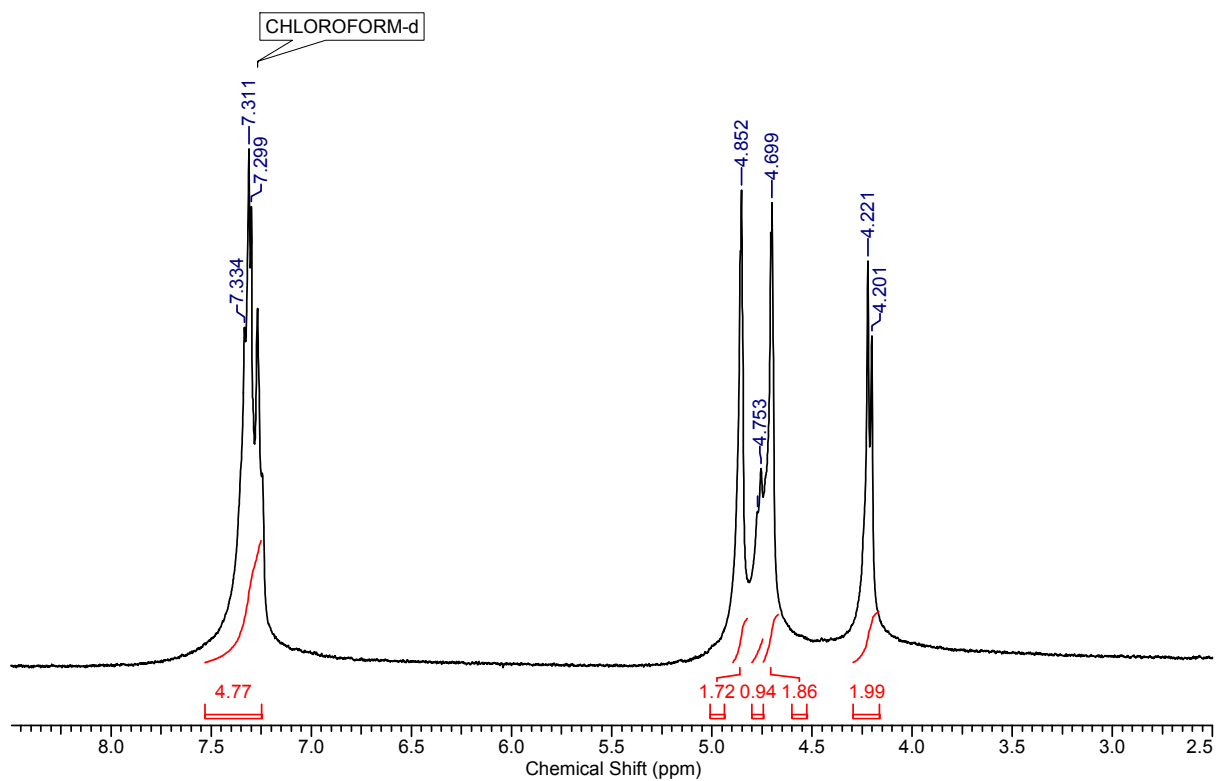

Figure S20  $^1\text{H}$ -NMR of **12** (300 MHz,  $\text{CDCl}_3$ )

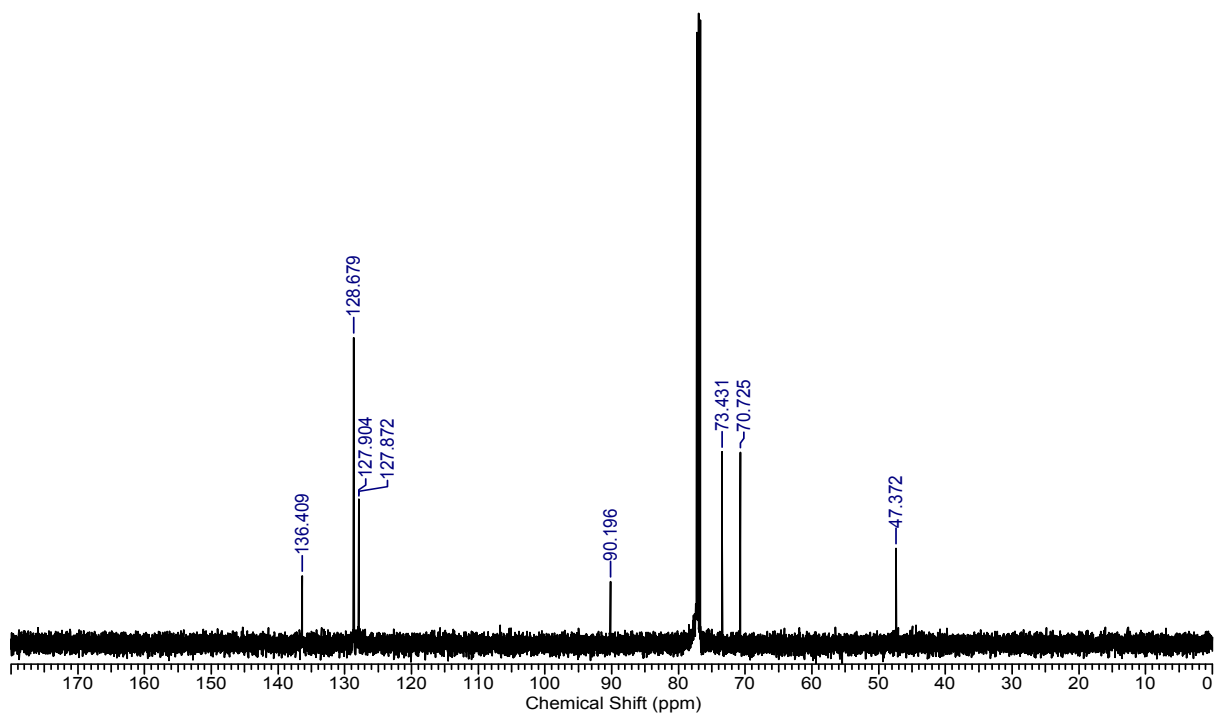

Figure S21  $^{13}\text{C}$ -NMR of **12** (500 MHz,  $\text{CDCl}_3$ )



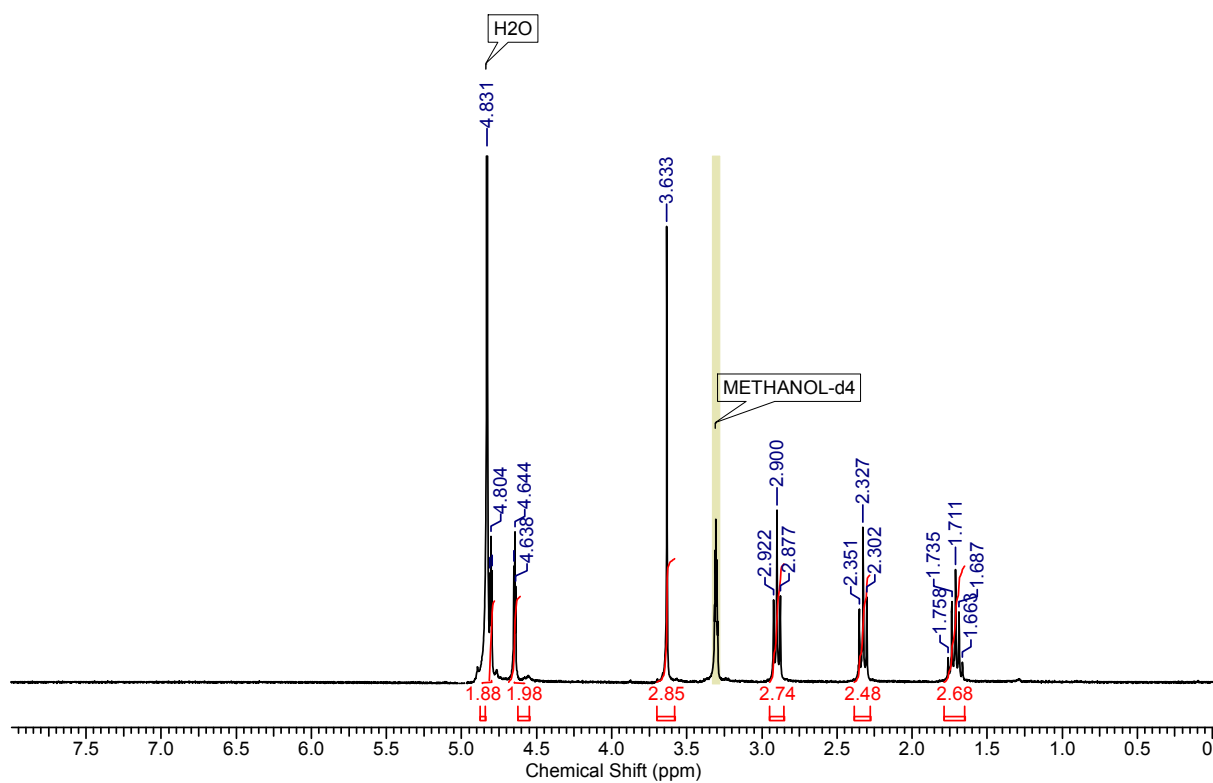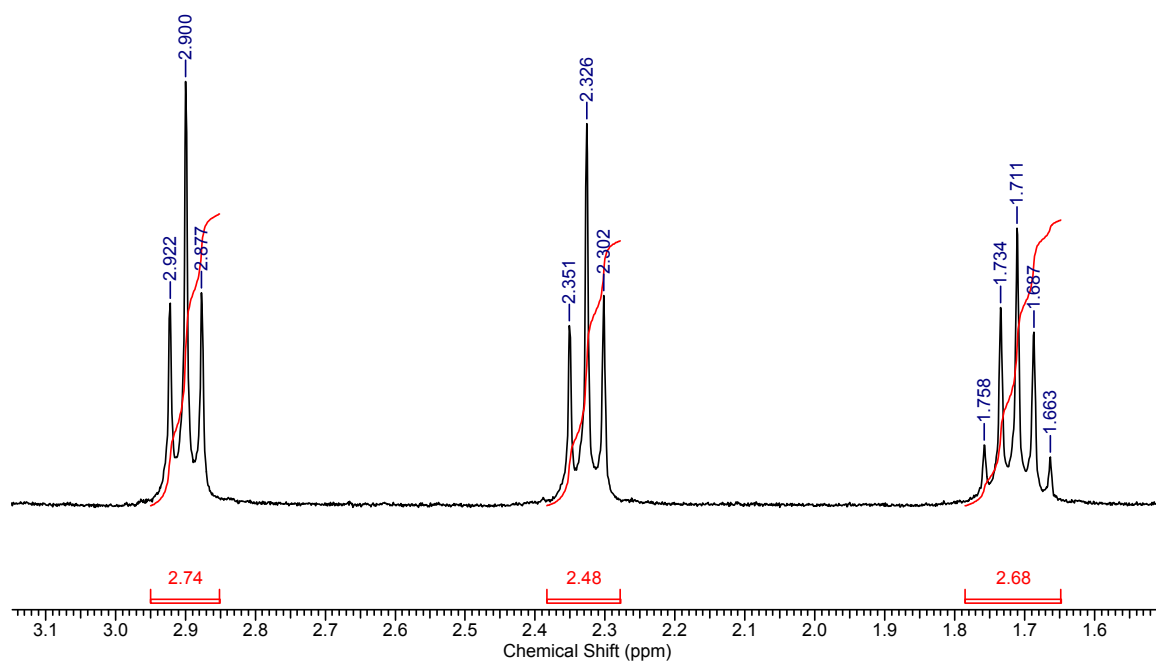

Figure S22 <sup>1</sup>H-NMR of **13** (300 MHz, CD<sub>3</sub>OD)

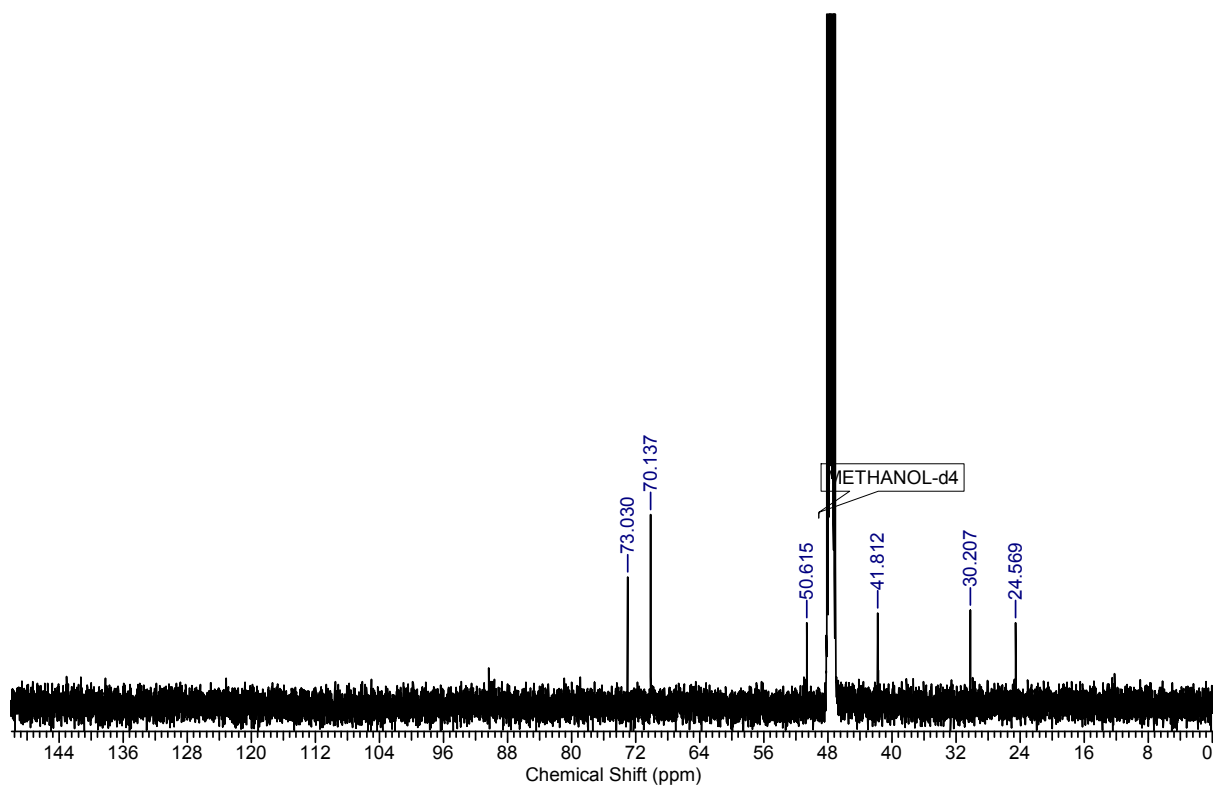

Figure S23  $^{13}\text{C}$ -NMR of **13** (500 MHz,  $\text{CD}_3\text{OD}$ )

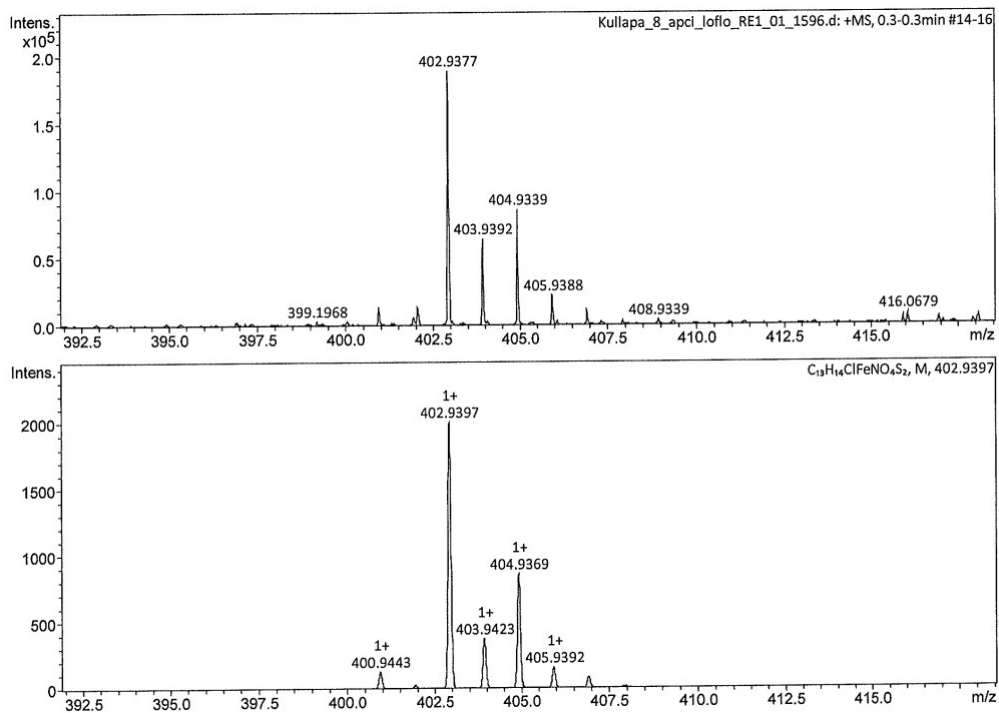

Figure S24 HRMS ESI of **4** (top: measured, bottom: calculated)

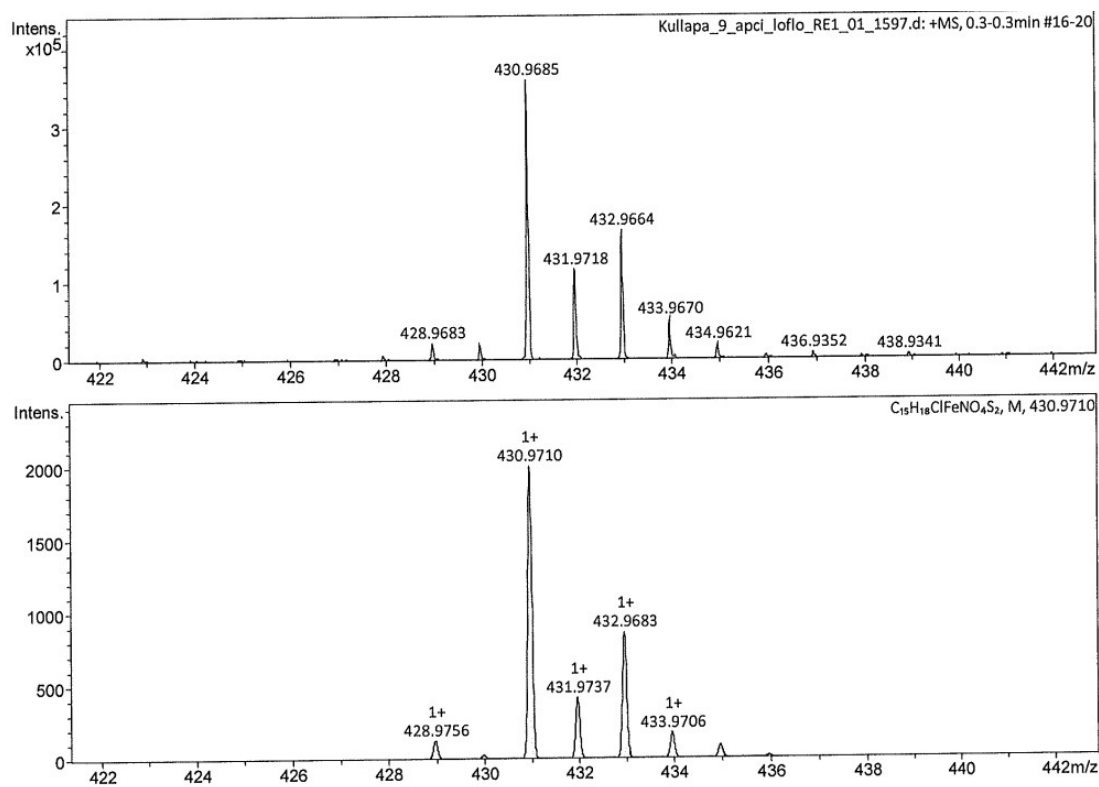

Figure S25 HRMS ESI of 5 (top: measured, bottom: calculated)

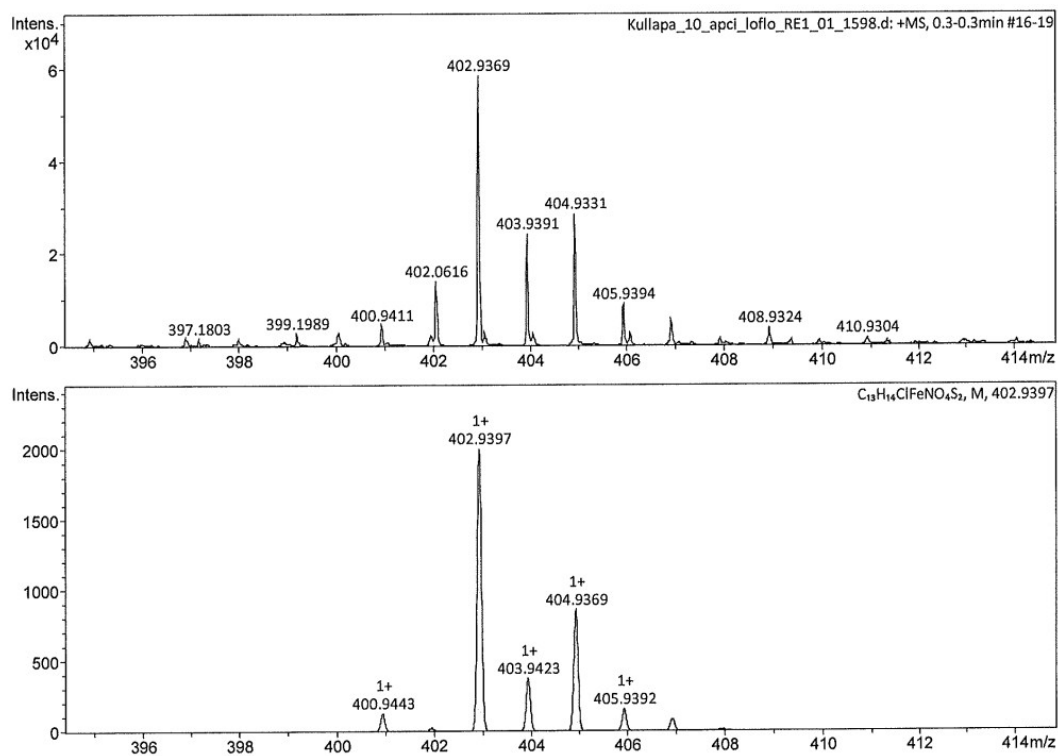

Figure S26 HRMS ESI of 6 (top: measured, bottom: calculated)

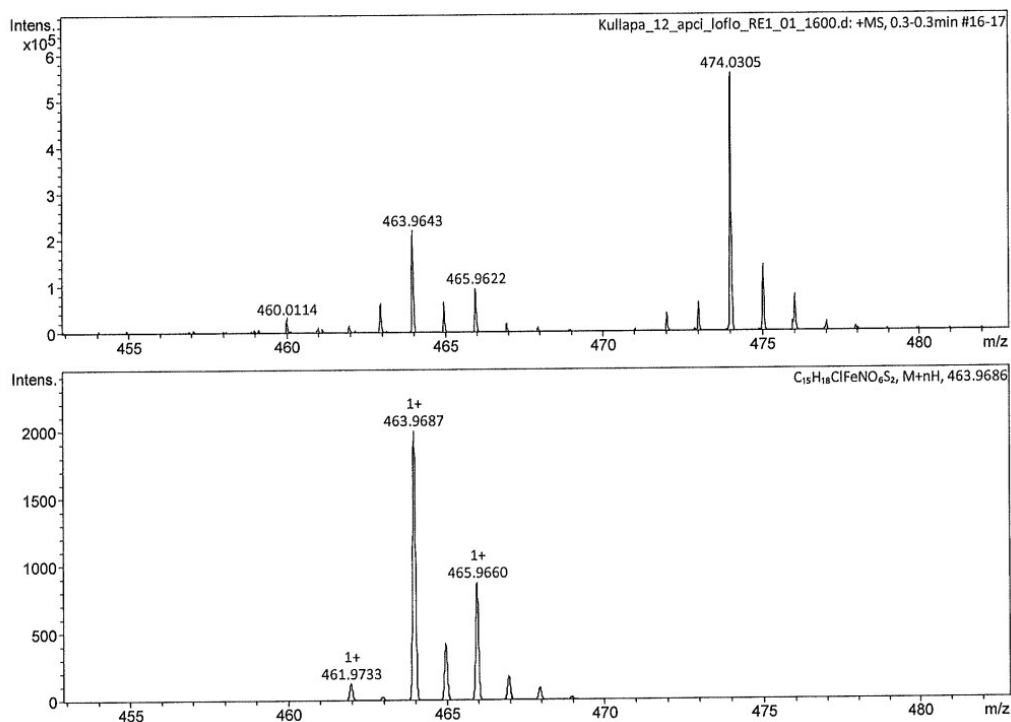

Figure S27 HRMS ESI of 7 (top: measured, bottom: calculated)

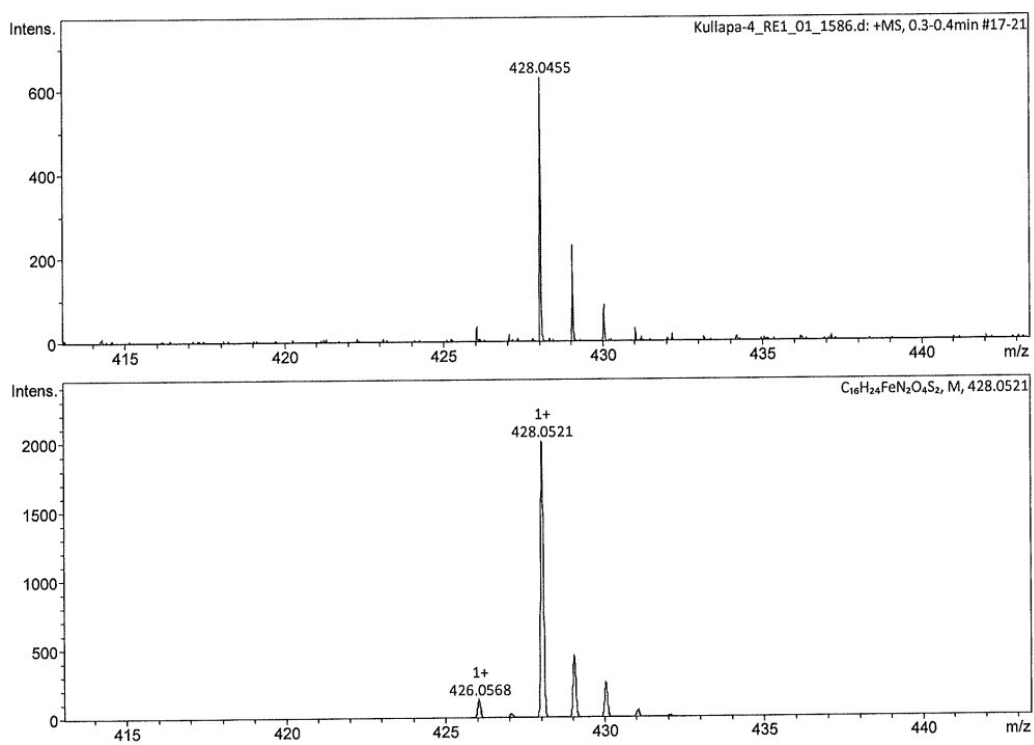

Figure S28 HRMS ESI of 8 (top: measured, bottom: calculated)

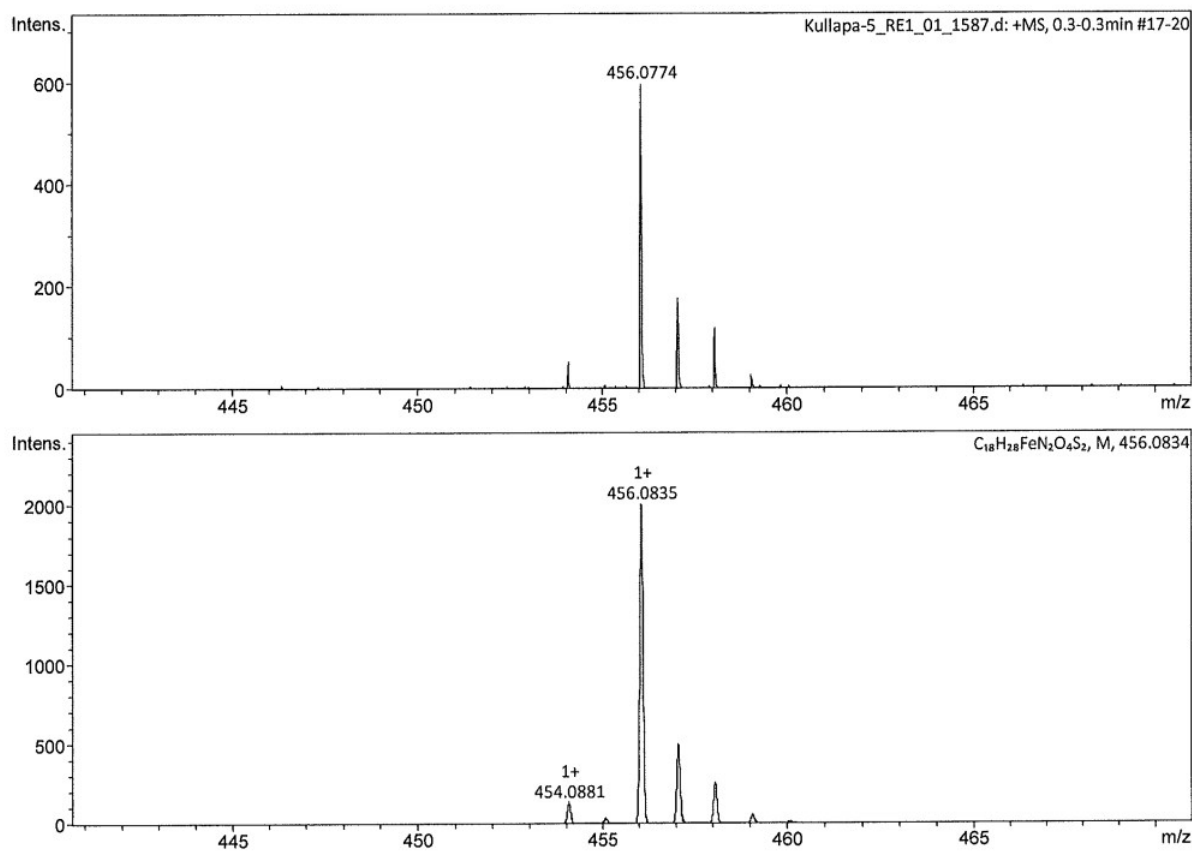

Figure S29 HRMS ESI of **9** (top: measured, bottom: calculated)

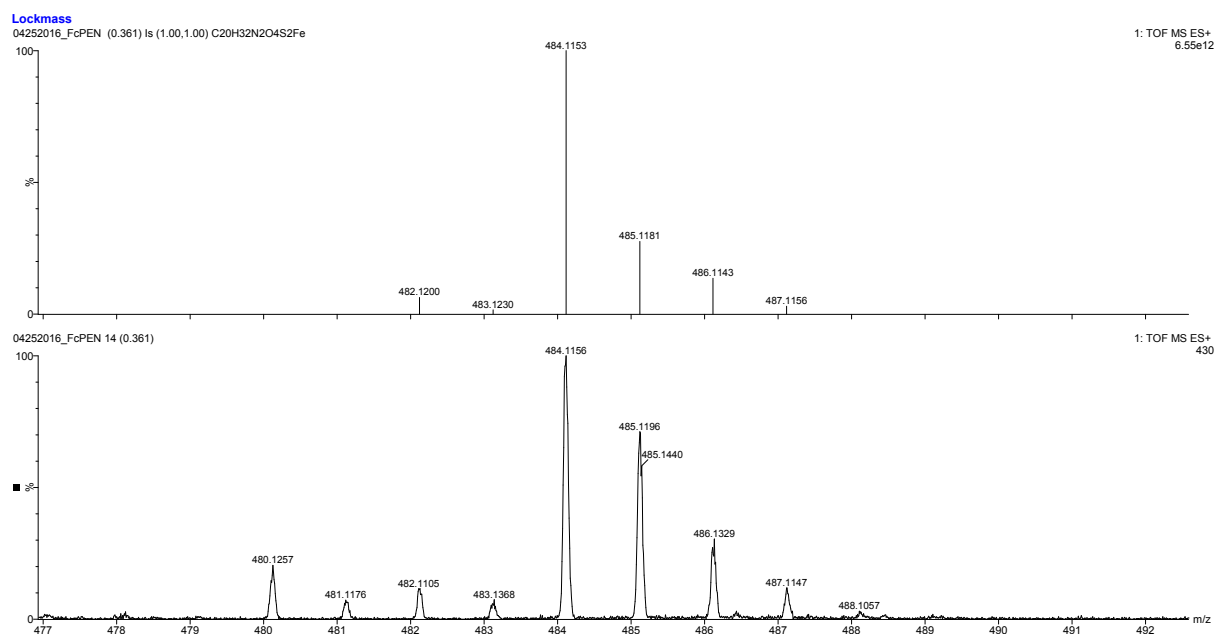

Figure S30 HRMS ESI of **10** (top: calculated, bottom: measured)

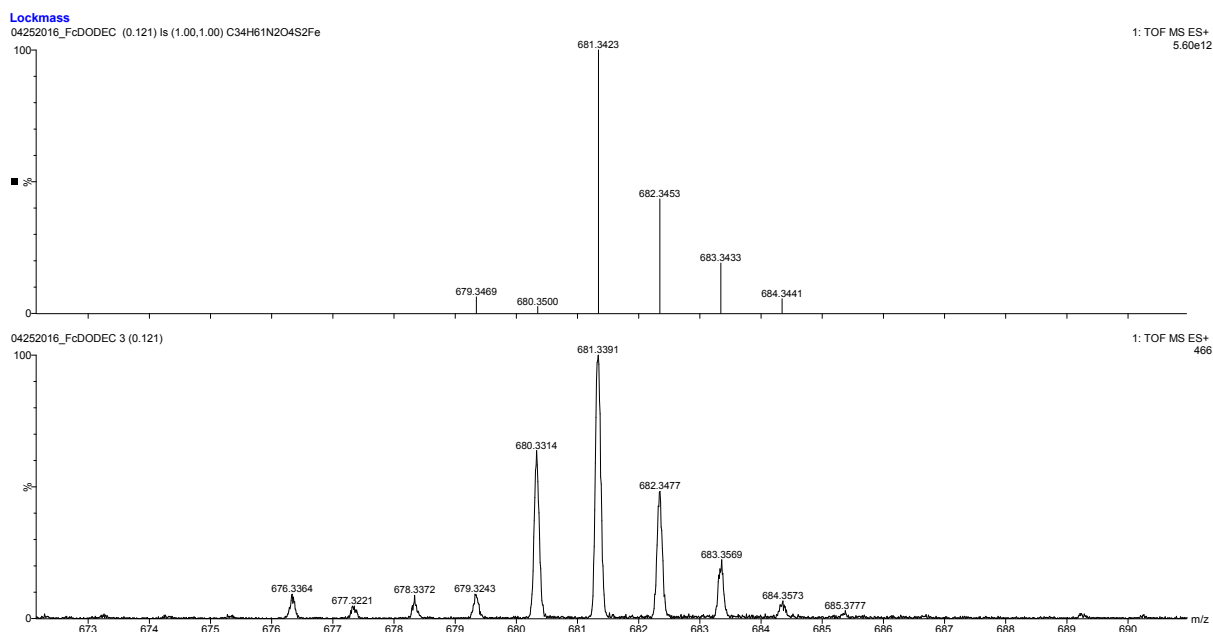

**Figure S31** HRMS ESI of **11** (top: calculated, bottom: measured)

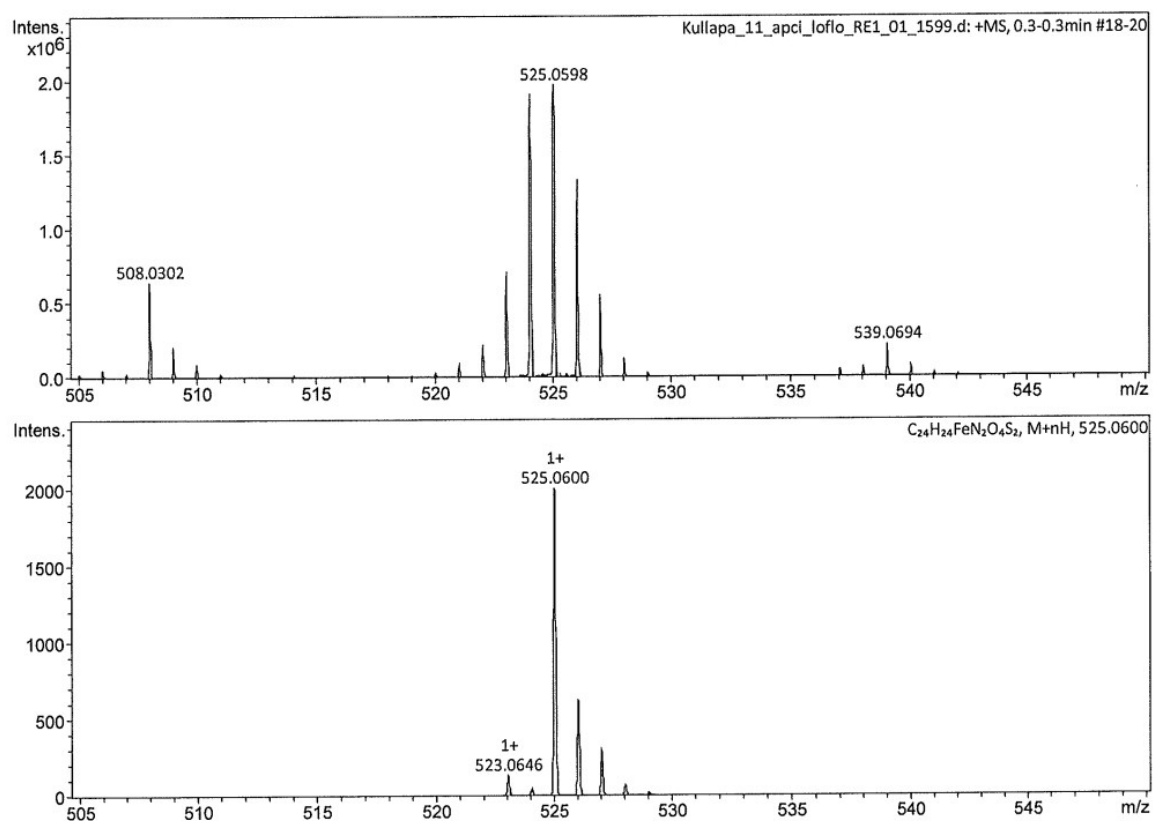

**Figure S32** HRMS ESI of **12** (top: measured, bottom: calculated)

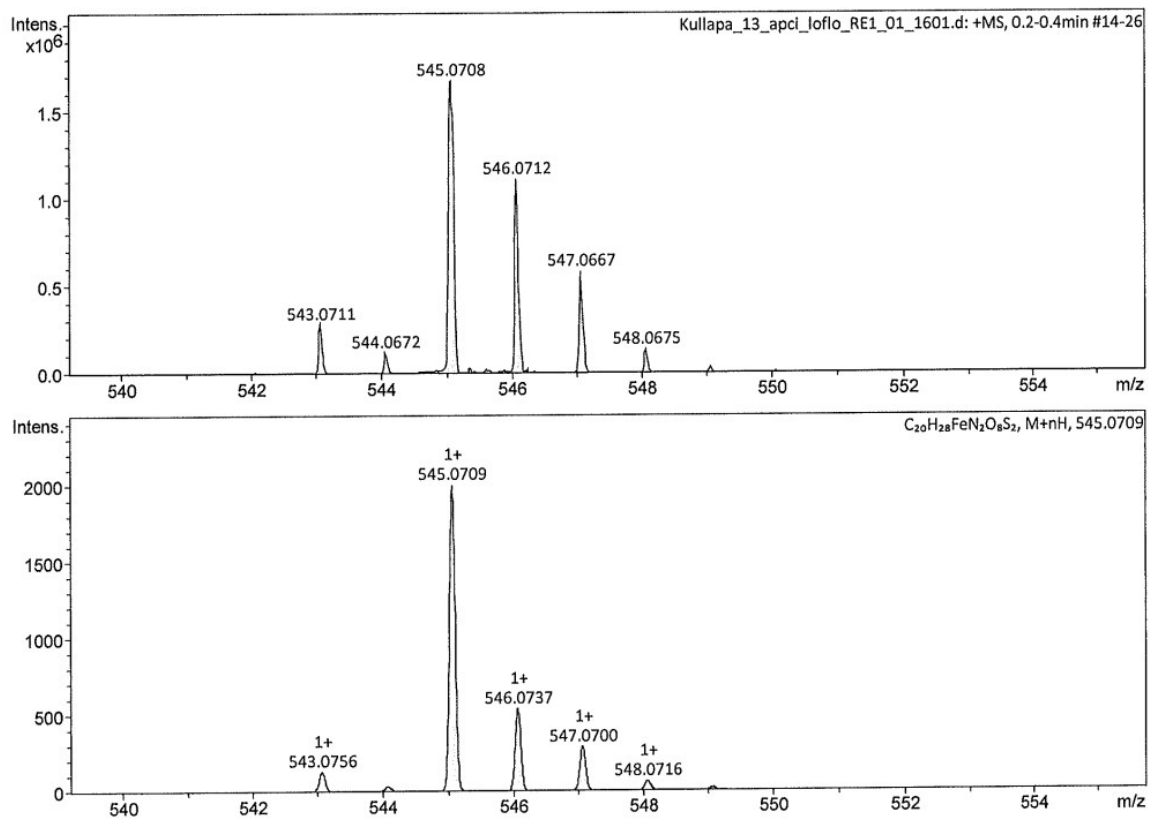

**Figure S33** HRMS ESI of **13** (top: measured, bottom: calculated)

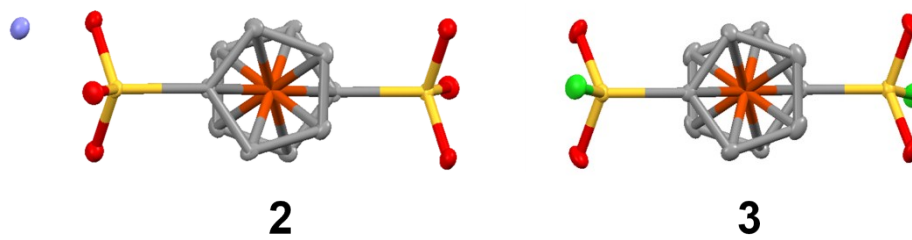

**Figure S34** Ferrocene geometries of **2** and **3**

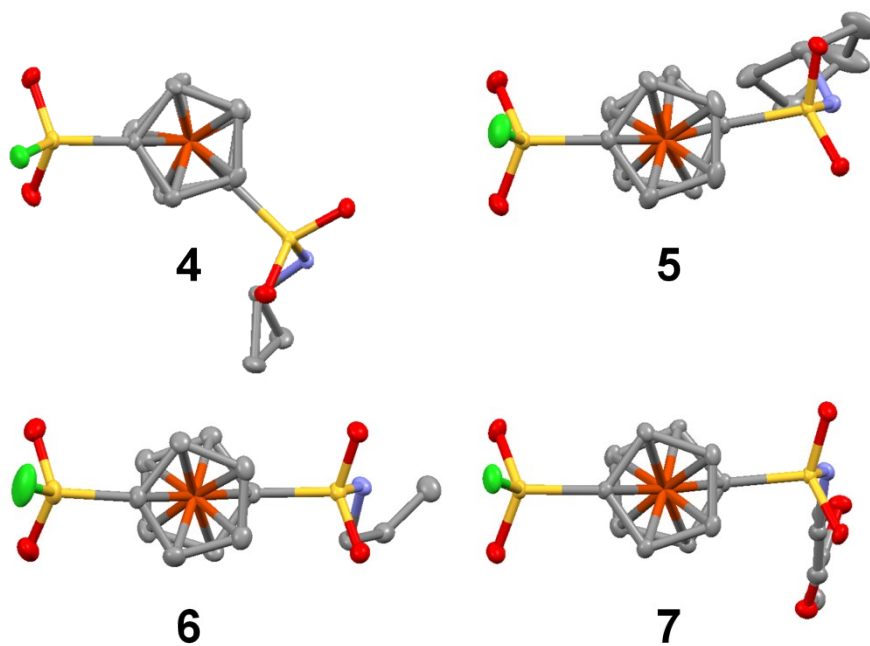

**Figure S35** Ferrocene geometries of mono sulfonamides 4-7

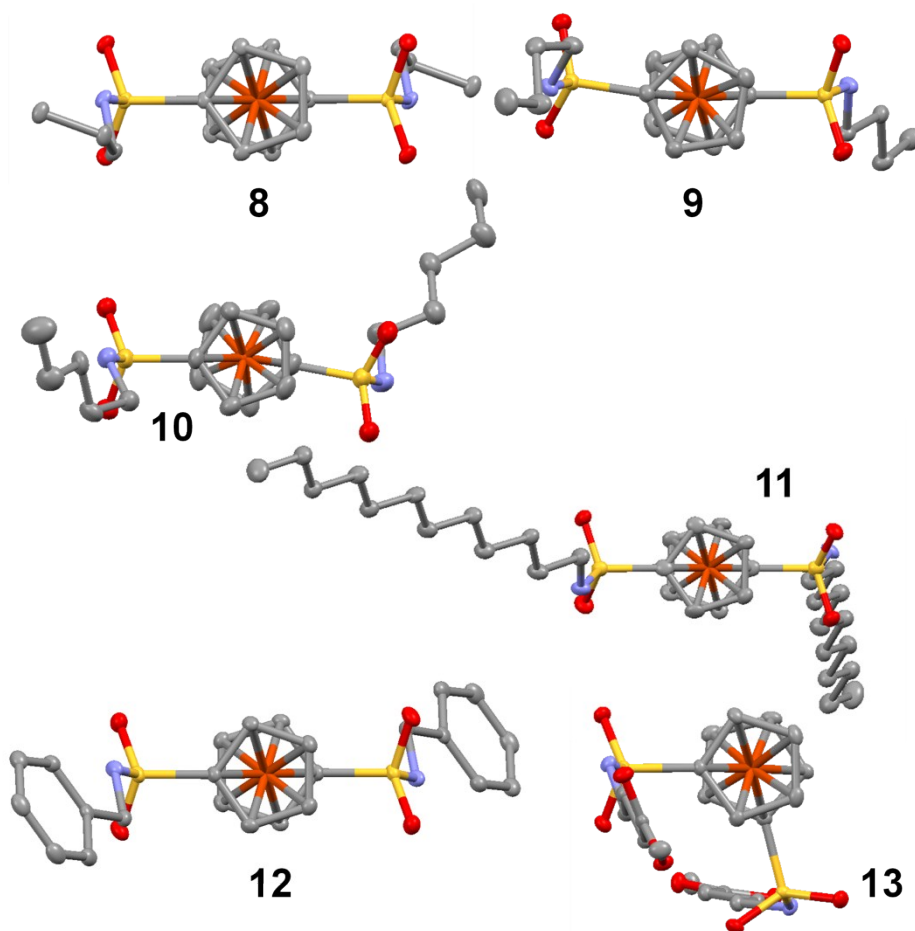

**Figure S36** Ferrocene geometries of bis sulfonamides 8-13



**Table S1** Crystal data and refinement parameters of compounds **2-13**

| Compound                                         | 2                                                                                            | 3                                                                              | 4                                                                  | 5                                                                  | 6                                                                  | 7                                                                  | 8                                                                                            | 9                                                                                            | 10                                                                                           | 11                                                                                           | 12                                                                                           | 13                                                                                           |
|--------------------------------------------------|----------------------------------------------------------------------------------------------|--------------------------------------------------------------------------------|--------------------------------------------------------------------|--------------------------------------------------------------------|--------------------------------------------------------------------|--------------------------------------------------------------------|----------------------------------------------------------------------------------------------|----------------------------------------------------------------------------------------------|----------------------------------------------------------------------------------------------|----------------------------------------------------------------------------------------------|----------------------------------------------------------------------------------------------|----------------------------------------------------------------------------------------------|
| Emp. form                                        | C <sub>10</sub> H <sub>16</sub> F <sub>2</sub> eN <sub>2</sub> O <sub>6</sub> S <sub>2</sub> | C <sub>10</sub> H <sub>8</sub> Cl <sub>2</sub> FeO <sub>4</sub> S <sub>2</sub> | C <sub>13</sub> H <sub>14</sub> ClFeNO <sub>4</sub> S <sub>2</sub> | C <sub>15</sub> H <sub>18</sub> ClFeNO <sub>4</sub> S <sub>2</sub> | C <sub>13</sub> H <sub>14</sub> ClFeNO <sub>4</sub> S <sub>2</sub> | C <sub>15</sub> H <sub>18</sub> ClFeNO <sub>6</sub> S <sub>2</sub> | C <sub>16</sub> H <sub>24</sub> F <sub>2</sub> eN <sub>2</sub> O <sub>4</sub> S <sub>2</sub> | C <sub>18</sub> H <sub>28</sub> F <sub>2</sub> eN <sub>2</sub> O <sub>4</sub> S <sub>2</sub> | C <sub>20</sub> H <sub>32</sub> F <sub>2</sub> eN <sub>2</sub> O <sub>4</sub> S <sub>2</sub> | C <sub>34</sub> H <sub>60</sub> F <sub>2</sub> eN <sub>2</sub> O <sub>4</sub> S <sub>2</sub> | C <sub>24</sub> H <sub>24</sub> F <sub>2</sub> eN <sub>2</sub> O <sub>4</sub> S <sub>2</sub> | C <sub>20</sub> H <sub>28</sub> F <sub>2</sub> eN <sub>2</sub> O <sub>8</sub> S <sub>2</sub> |
| Form. weight                                     | 380.22                                                                                       | 383.03                                                                         | 403.67                                                             | 431.72                                                             | 403.67                                                             | 463.72                                                             | 428.34                                                                                       | 456.40                                                                                       | 484.45                                                                                       | 680.83                                                                                       | 524.42                                                                                       | 544.41                                                                                       |
| Crystal system                                   | Monoclinic                                                                                   | Monoclinic                                                                     | Monoclinic                                                         | Triclinic                                                          | Triclinic                                                          | Triclinic                                                          | Monoclinic                                                                                   | Monoclinic                                                                                   | Triclinic                                                                                    | Monoclinic                                                                                   | Monoclinic                                                                                   | Monoclinic                                                                                   |
| Space group                                      | P2 <sub>1</sub> /c                                                                           | P2 <sub>1</sub> /c                                                             | P2 <sub>1</sub> /n                                                 | P-1                                                                | P-1                                                                | P-1                                                                | P2 <sub>1</sub> /c                                                                           | P2 <sub>1</sub> /c                                                                           | P-1                                                                                          | P2 <sub>1</sub> /c                                                                           | P2 <sub>1</sub> /n                                                                           | C2/c                                                                                         |
| a/ Å                                             | 9.8760(6)                                                                                    | 7.9181(3)                                                                      | 14.2039(16)                                                        | 7.6445(2)                                                          | 7.4865(3)                                                          | 6.1935(2)                                                          | 9.1202(5)                                                                                    | 8.8433(2)                                                                                    | 11.6821(12)                                                                                  | 9.8354(18)                                                                                   | 8.5381(3)                                                                                    | 29.718(3)                                                                                    |
| b/ Å                                             | 5.5764(3)                                                                                    | 7.7541(2)                                                                      | 6.7783(8)                                                          | 10.0532(2)                                                         | 7.5363(3)                                                          | 6.8408(3)                                                          | 12.7387(6)                                                                                   | 23.1800(5)                                                                                   | 12.4196(13)                                                                                  | 7.6469(14)                                                                                   | 9.4320(4)                                                                                    | 6.7980(7)                                                                                    |
| c/ Å                                             | 12.5720(7)                                                                                   | 10.7240(4)                                                                     | 16.7399(19)                                                        | 12.1654(3)                                                         | 14.9763(6)                                                         | 21.6753(8)                                                         | 8.0686(4)                                                                                    | 10.4639(2)                                                                                   | 15.6230(16)                                                                                  | 46.916(9)                                                                                    | 13.8114(5)                                                                                   | 11.6656(12)                                                                                  |
| α(°)                                             | 90                                                                                           | 90                                                                             | 90                                                                 | 68.8020(10)                                                        | 87.392(2)                                                          | 90.4550(10)                                                        | 90                                                                                           | 90                                                                                           | 99.412(7)                                                                                    | 90                                                                                           | 90                                                                                           | 90                                                                                           |
| β(°)                                             | 101.134(3)                                                                                   | 99.0150(10)                                                                    | 106.824(5)                                                         | 87.4870(10)                                                        | 86.354(2)                                                          | 93.3320(10)                                                        | 111.388(2)                                                                                   | 108.4280(10)                                                                                 | 94.062(7)                                                                                    | 90.805(11)                                                                                   | 95.640(2)                                                                                    | 111.369(7)                                                                                   |
| γ(°)                                             | 90                                                                                           | 90                                                                             | 90                                                                 | 84.9240(10)                                                        | 65.8810(10)                                                        | 108.2330(10)                                                       | 90                                                                                           | 90                                                                                           | 94.877(7)                                                                                    | 90                                                                                           | 90                                                                                           | 90                                                                                           |
| Volume (Å <sup>3</sup> )                         | 679.34(7)                                                                                    | 650.30(4)                                                                      | 1542.7(3)                                                          | 868.18(4)                                                          | 769.47(5)                                                          | 870.44(6)                                                          | 872.85(8)                                                                                    | 2034.98(8)                                                                                   | 2219.8(4)                                                                                    | 3528.2(11)                                                                                   | 1106.87(7)                                                                                   | 2194.7(4)                                                                                    |
| Z                                                | 2                                                                                            | 2                                                                              | 4                                                                  | 2                                                                  | 2                                                                  | 2                                                                  | 2                                                                                            | 4                                                                                            | 4                                                                                            | 4                                                                                            | 2                                                                                            | 4                                                                                            |
| Dc (Mg/m <sup>3</sup> )                          | 1.859                                                                                        | 1.956                                                                          | 1.738                                                              | 1.651                                                              | 1.742                                                              | 1.769                                                              | 1.630                                                                                        | 1.493                                                                                        | 1.450                                                                                        | 1.285                                                                                        | 1.573                                                                                        | 1.654                                                                                        |
| μ (mm <sup>-1</sup> )                            | 1.446                                                                                        | 1.895                                                                          | 1.436                                                              | 1.282                                                              | 12.150                                                             | 1.294                                                              | 1.128                                                                                        | 0.973                                                                                        | 0.896                                                                                        | 0.584                                                                                        | 0.906                                                                                        | 0.930                                                                                        |
| F(000)                                           | 392                                                                                          | 384                                                                            | 824                                                                | 444                                                                | 412                                                                | 476                                                                | 448                                                                                          | 964                                                                                          | 900                                                                                          | 1480                                                                                         | 544                                                                                          | 1144                                                                                         |
| Reflections collected                            | 1212                                                                                         | 4439                                                                           | 92930                                                              | 12452                                                              | 8179                                                               | 23712                                                              | 6294                                                                                         | 29964                                                                                        | 23581                                                                                        | 124602                                                                                       | 15774                                                                                        | 15126                                                                                        |
| Data/Restraints/Parameters                       | 1212 / 1 / 113                                                                               | 1147 / 0 / 88                                                                  | 3110 / 0 / 199                                                     | 3770 / 0 / 217                                                     | 2329 / 0 / 208                                                     | 3795 / 0 / 236                                                     | 1908 / 0 / 116                                                                               | 4436 / 0 / 246                                                                               | 9199 / 0 / 527                                                                               | 7438 / 0 / 390                                                                               | 2411 / 0 / 151                                                                               | 2393 / 0 / 151                                                                               |
| GOF on F <sup>2</sup>                            | 1.224                                                                                        | 1.169                                                                          | 1.125                                                              | 1.055                                                              | 1.069                                                              | 0.965                                                              | 1.366                                                                                        | 1.076                                                                                        | 1.200                                                                                        | 1.071                                                                                        | 0.959                                                                                        | 1.026                                                                                        |
| R1 (on F <sub>o</sub> <sup>2</sup> , I > 2σ(I))  | 0.0571                                                                                       | 0.0223                                                                         | 0.0383                                                             | 0.0301                                                             | 0.0328                                                             | 0.0335                                                             | 0.0394                                                                                       | 0.0355                                                                                       | 0.0775                                                                                       | 0.1036                                                                                       | 0.0299                                                                                       | 0.0305                                                                                       |
| wR2 (on F <sub>o</sub> <sup>2</sup> , I > 2σ(I)) | 0.1645                                                                                       | 0.0612                                                                         | 0.0819                                                             | 0.0747                                                             | 0.0913                                                             | 0.0814                                                             | 0.1122                                                                                       | 0.1011                                                                                       | 0.2039                                                                                       | 0.2527                                                                                       | 0.0757                                                                                       | 0.0807                                                                                       |
| R1 (all data)                                    | 0.0759                                                                                       | 0.0228                                                                         | 0.0396                                                             | 0.0308                                                             | 0.0335                                                             | 0.0363                                                             | 0.0405                                                                                       | 0.0387                                                                                       | 0.1079                                                                                       | 0.1584                                                                                       | 0.0304                                                                                       | 0.0317                                                                                       |
| wR2 (all data)                                   | 0.1743                                                                                       | 0.0620                                                                         | 0.0825                                                             | 0.0754                                                             | 0.0921                                                             | 0.0846                                                             | 0.1133                                                                                       | 0.1048                                                                                       | 0.2221                                                                                       | 0.2955                                                                                       | 0.0765                                                                                       | 0.0816                                                                                       |

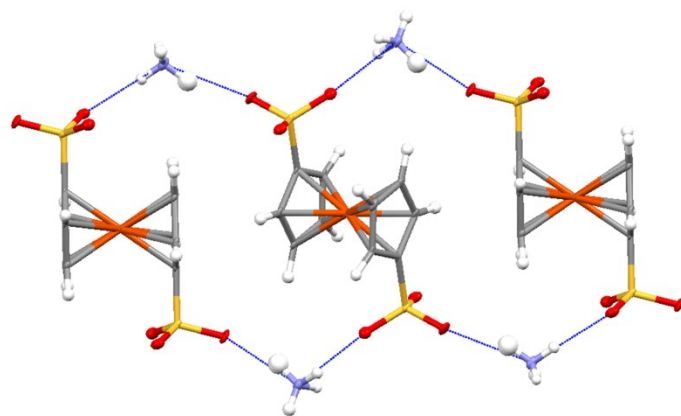

2

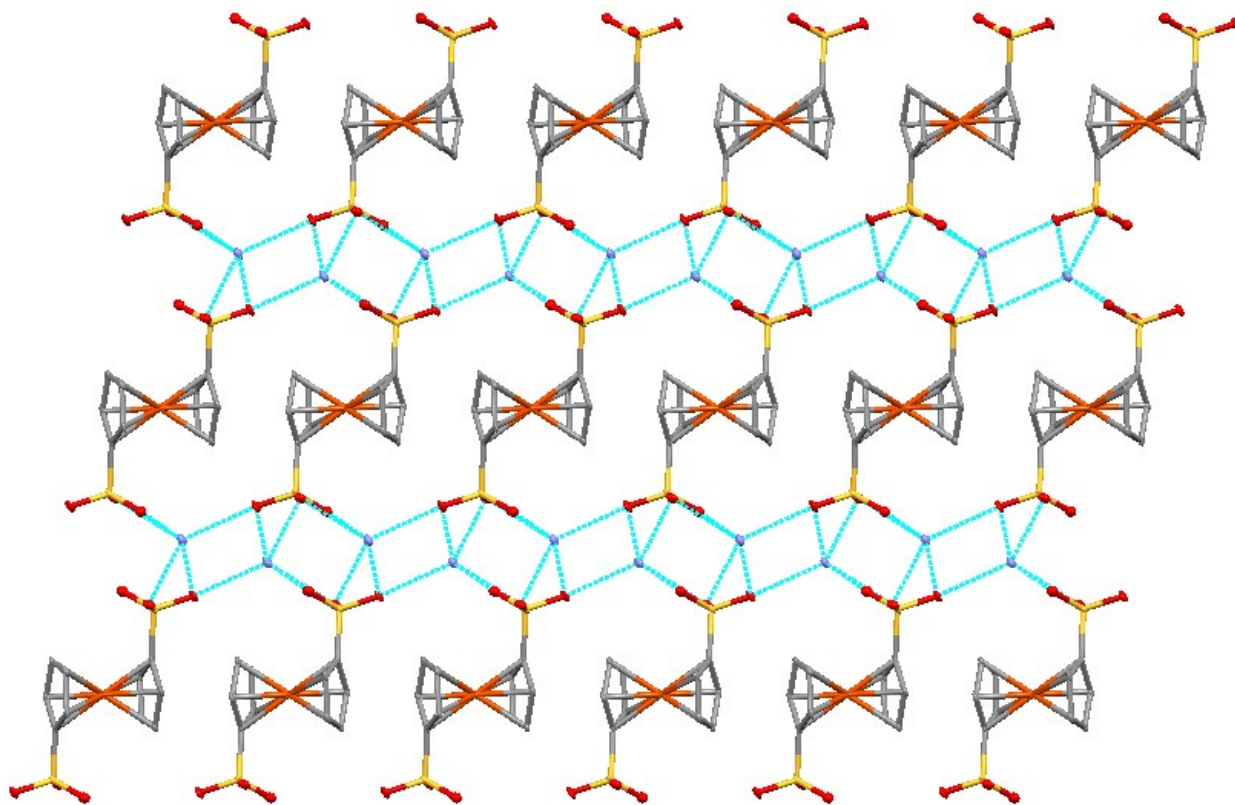

**Figure S37** The packing diagrams with intermolecular hydrogen bonding interactions (blue dash lines) of 2

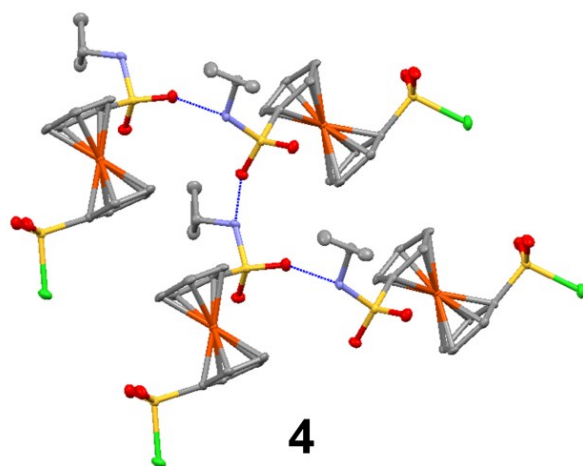

4

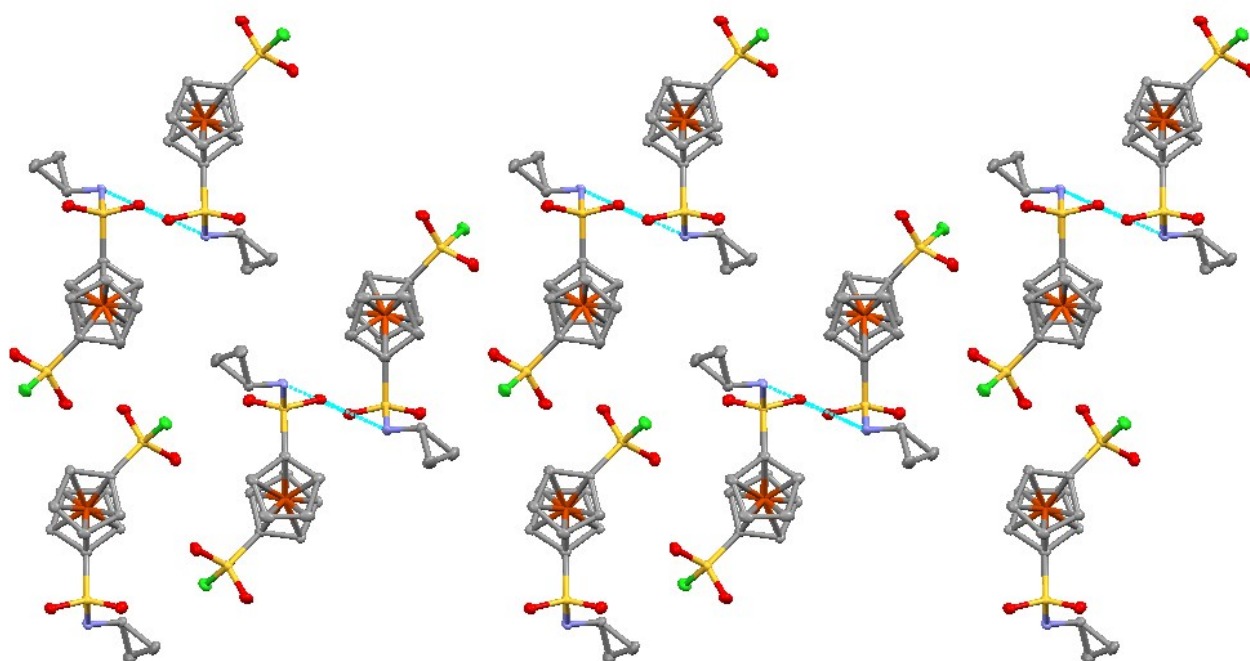

**Figure S38** The packing diagrams with intermolecular hydrogen bonding interactions (blue dash lines) of 4

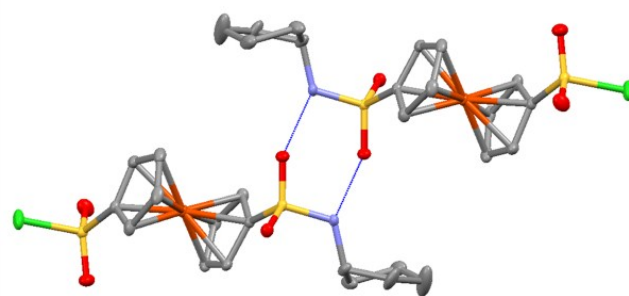

5

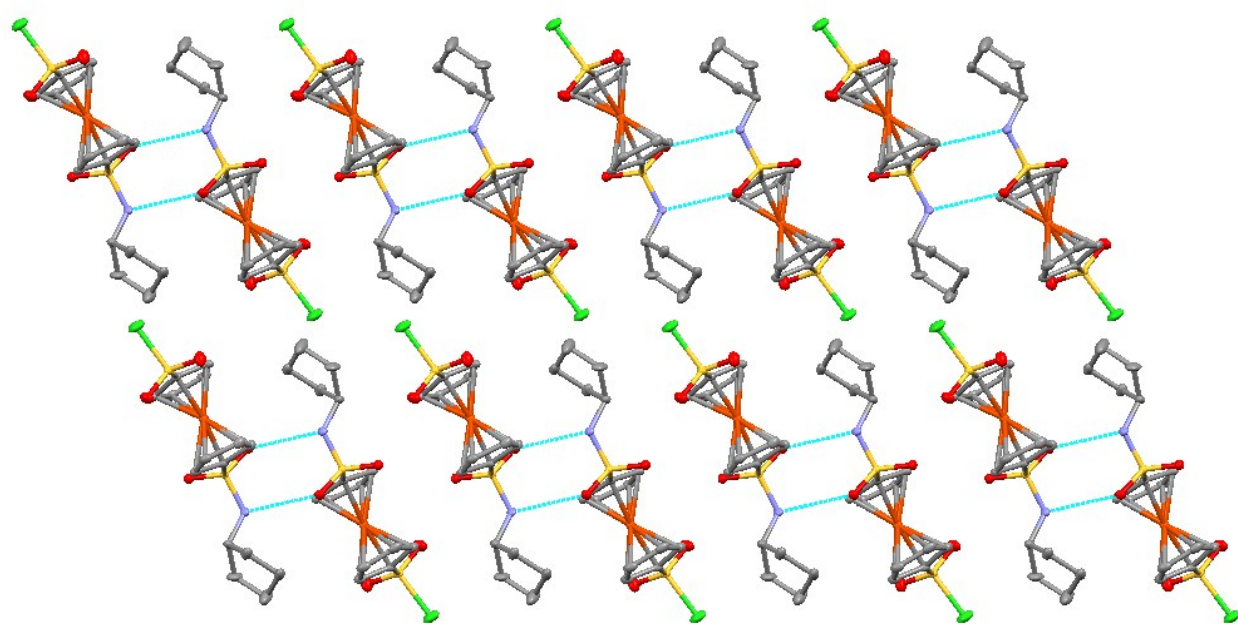

**Figure S39** The packing diagrams with intermolecular hydrogen bonding interactions (blue dash lines) of 5

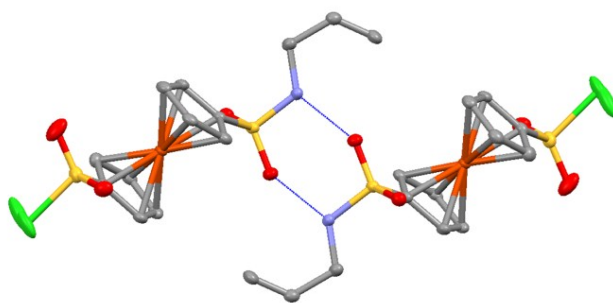

6

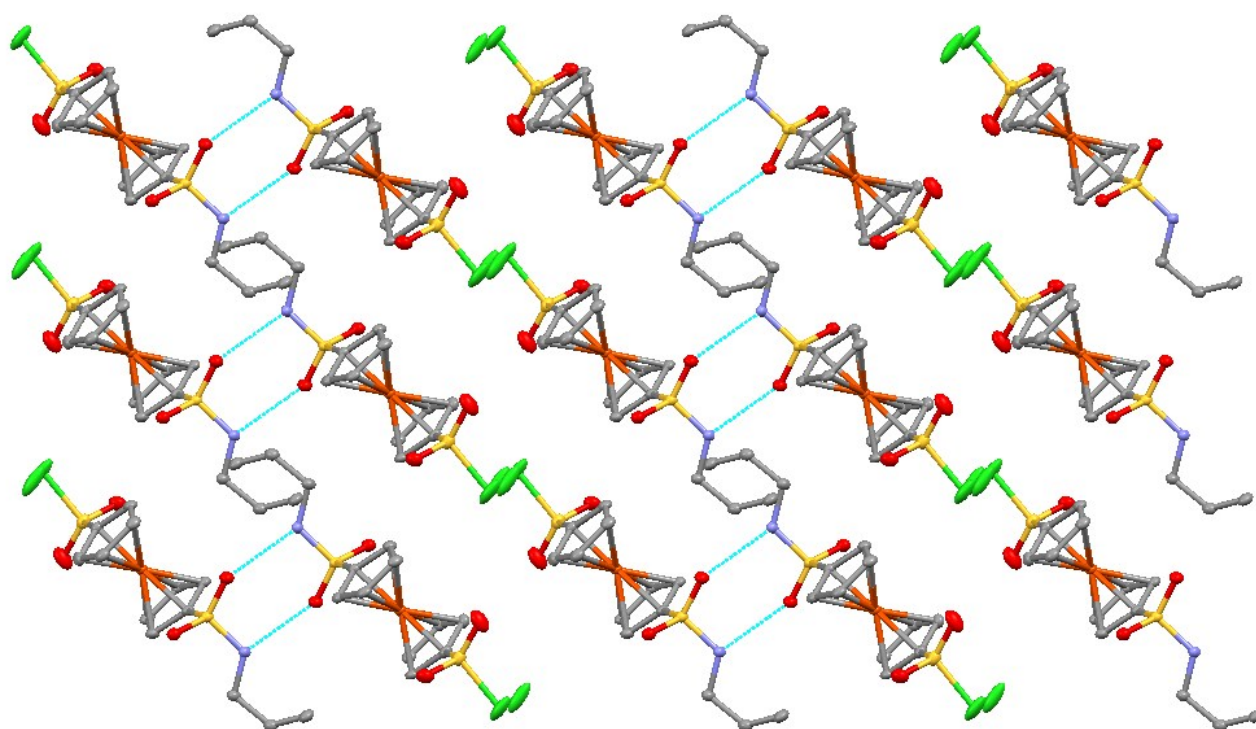

**Figure S40** The packing diagrams with intermolecular hydrogen bonding interactions (blue dash lines) of 6

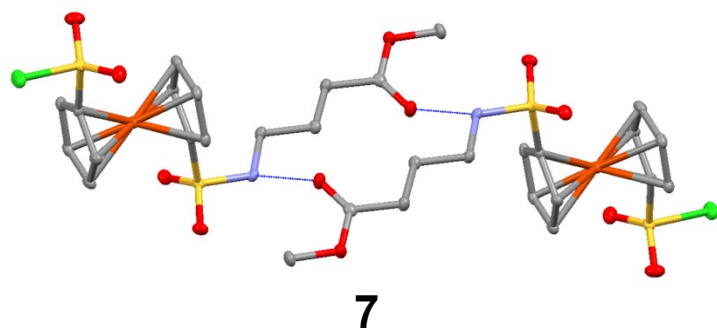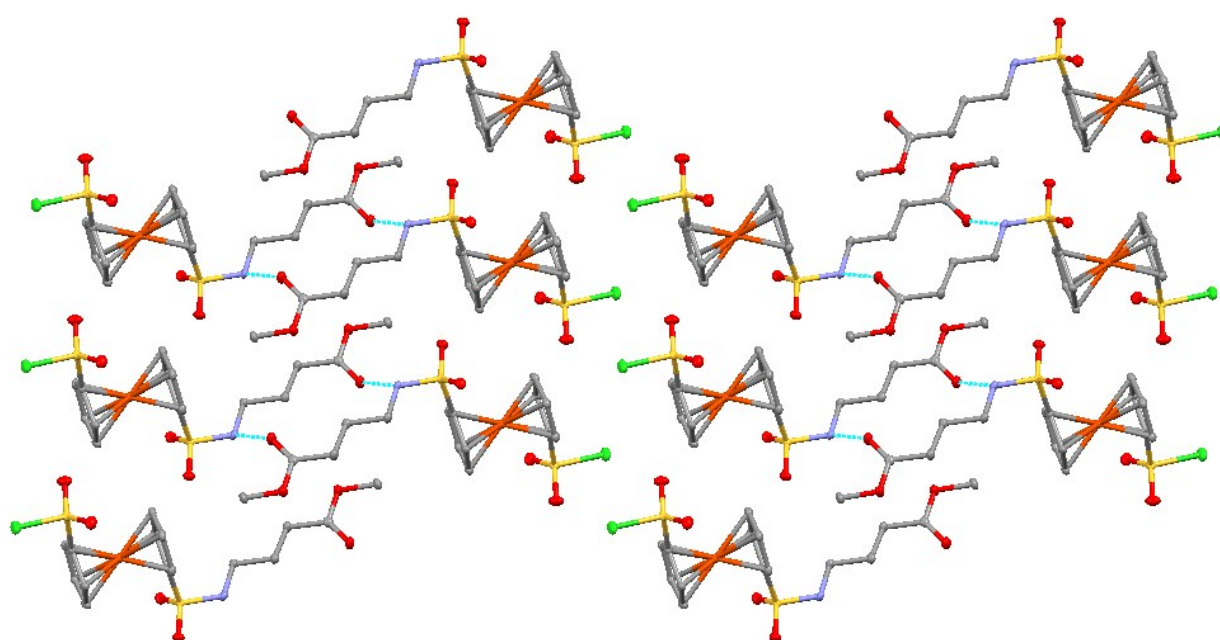

**Figure S41** The packing diagrams with intermolecular hydrogen bonding interactions (blue dash lines) of 7



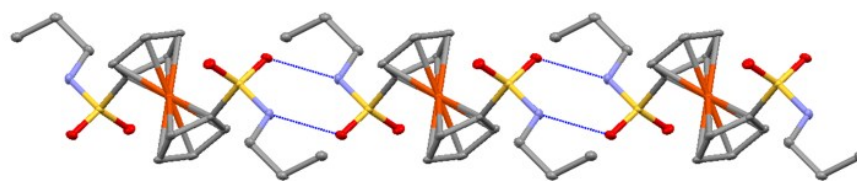

8

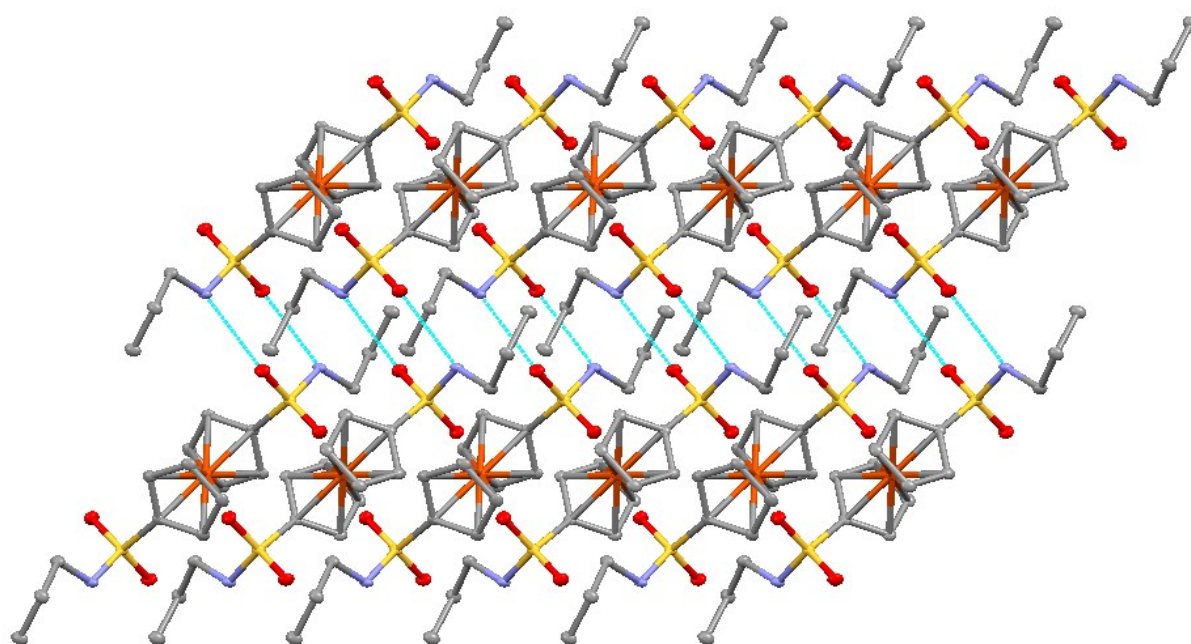

**Figure S42** The packing diagrams with intermolecular hydrogen bonding interactions (blue dash lines) of **8**

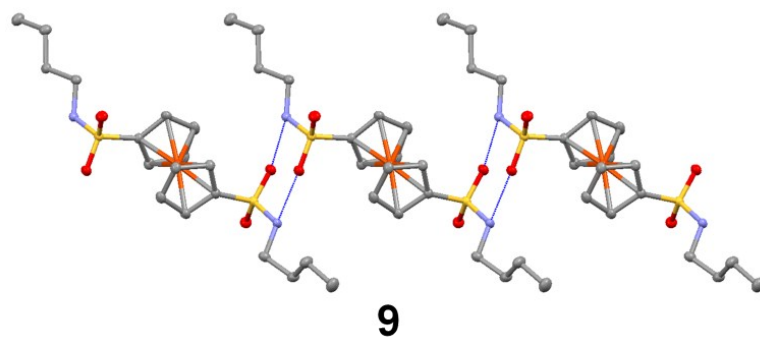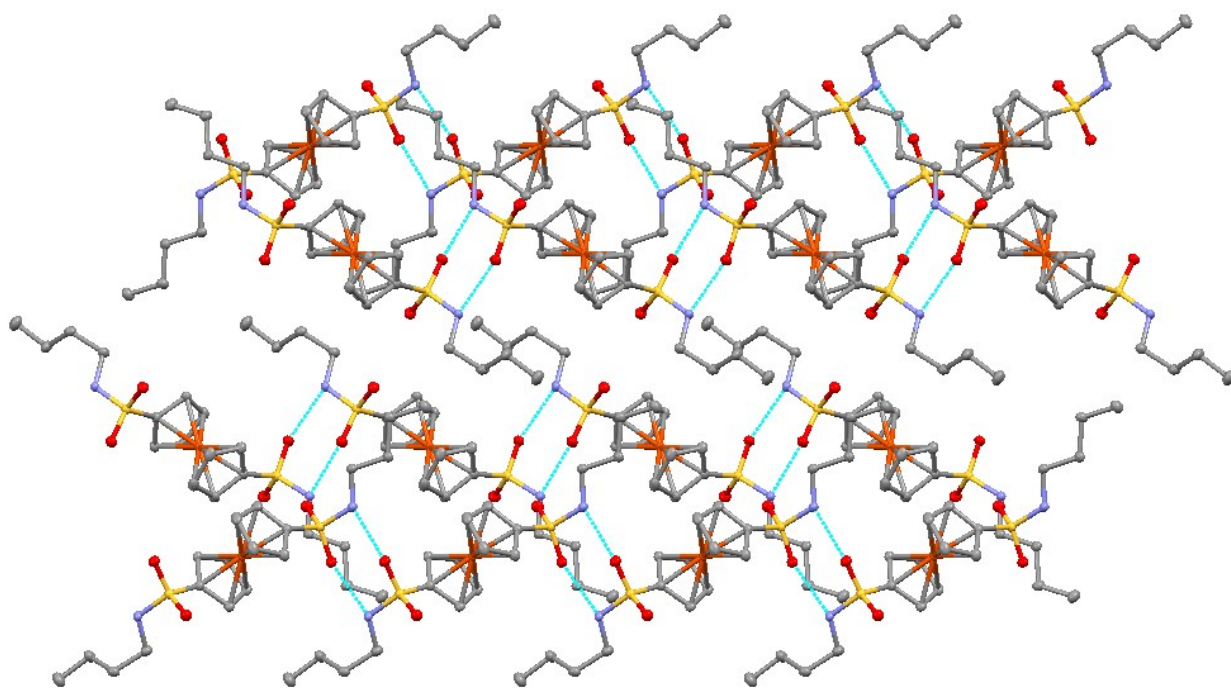

**Figure S43** The packing diagrams with intermolecular hydrogen bonding interactions (blue dash lines) of **9**



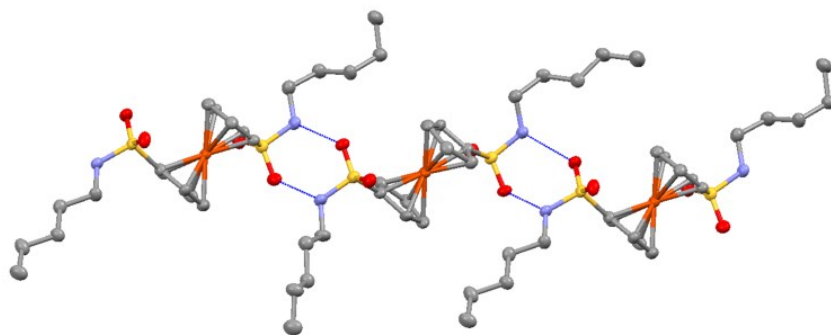

10

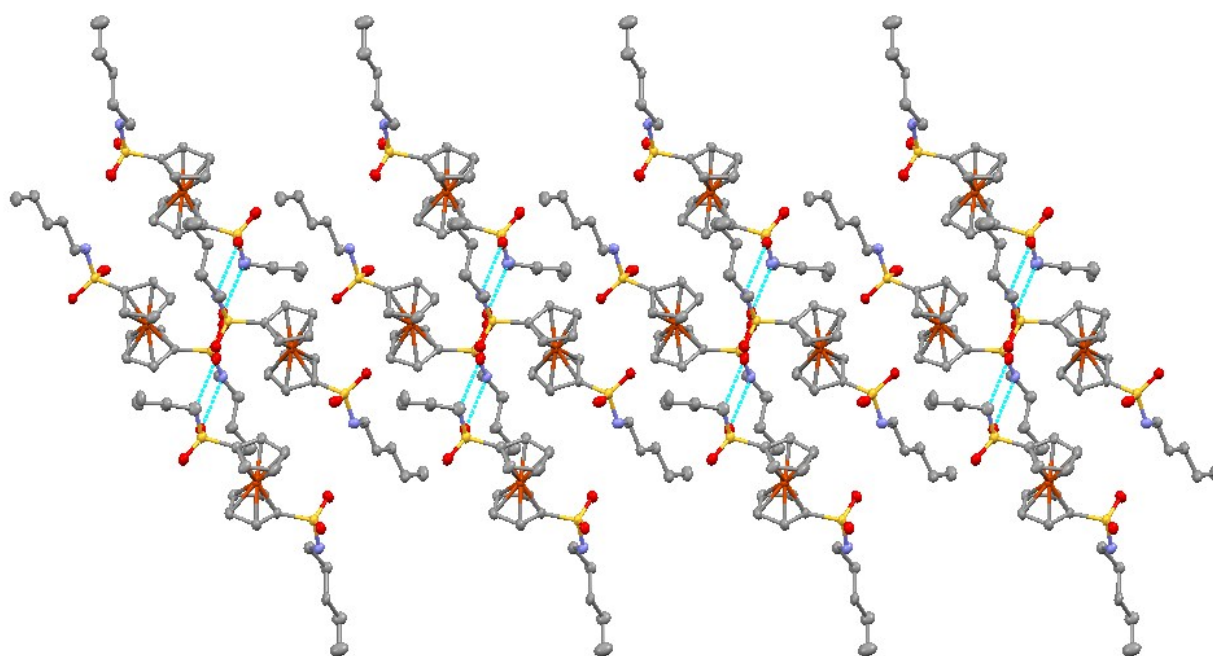

**Figure S44** The packing diagrams with intermolecular hydrogen bonding interactions (blue dash lines) of **10**

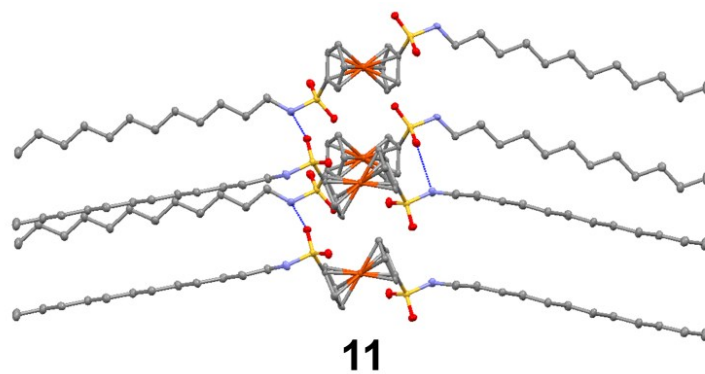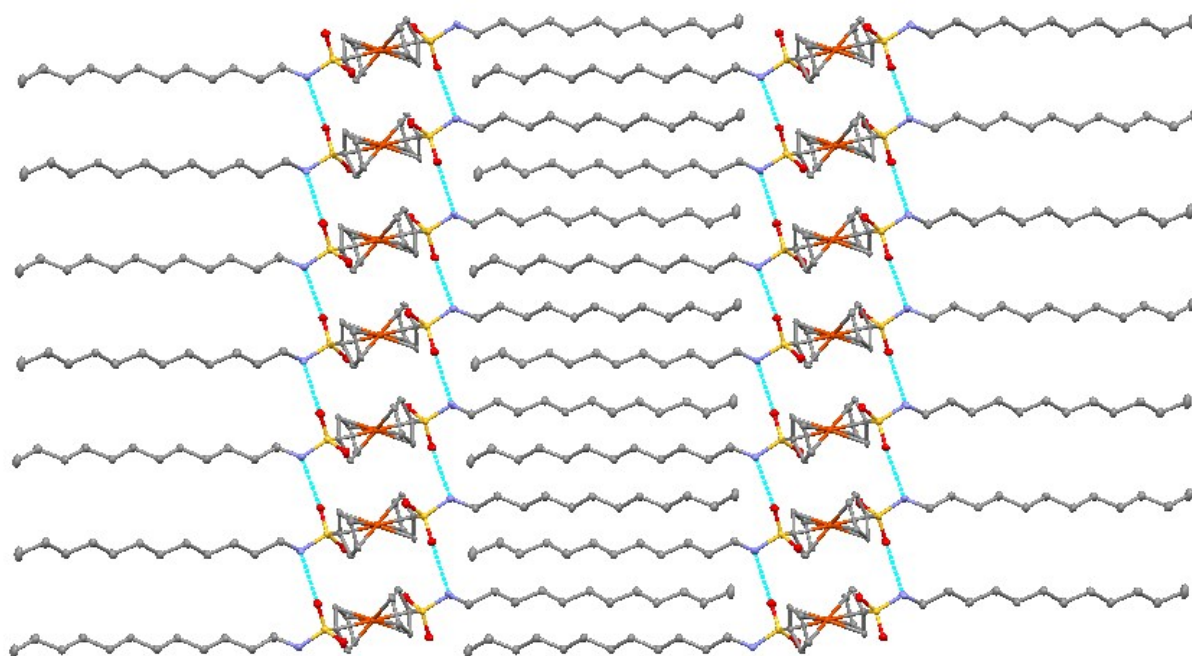

**Figure S45** The packing diagrams with intermolecular hydrogen bonding interactions (blue dash lines) of **11**

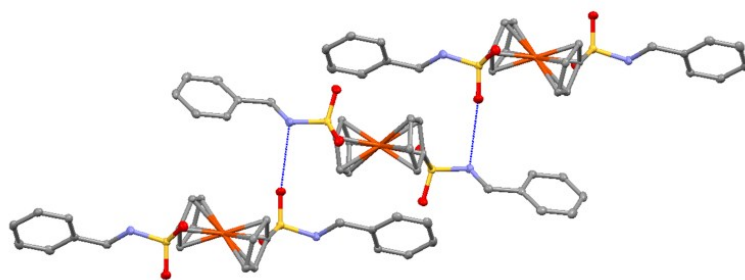

12

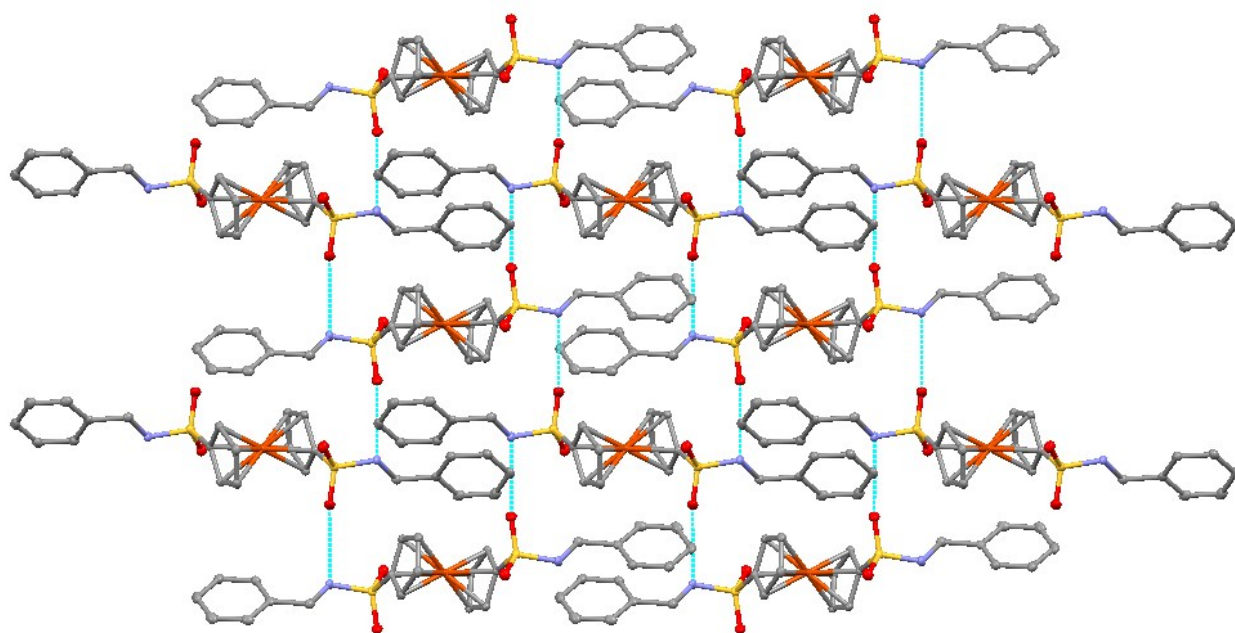

**Figure S46** The packing diagrams with intermolecular hydrogen bonding interactions (blue dash lines) of 12

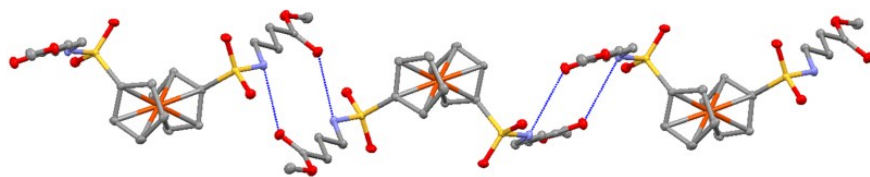

13

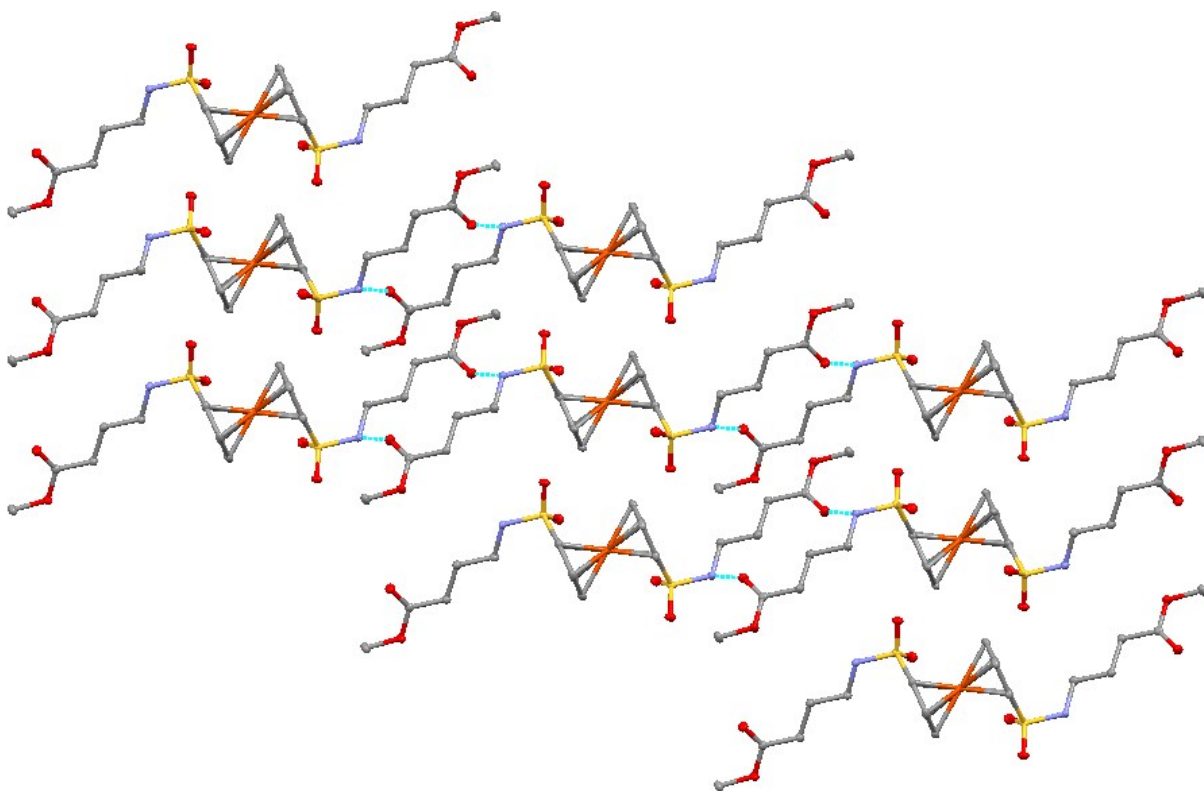

**Figure S47** The packing diagrams with intermolecular hydrogen bonding interactions (blue dash lines) of **13**

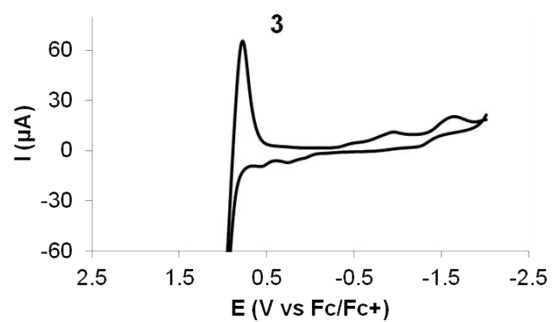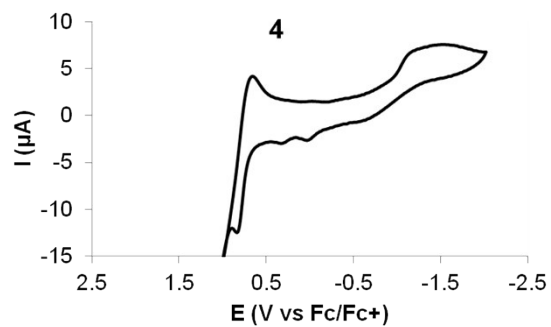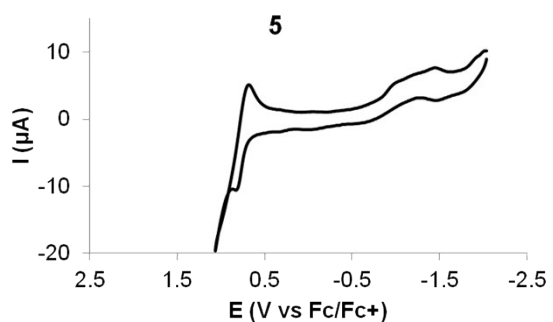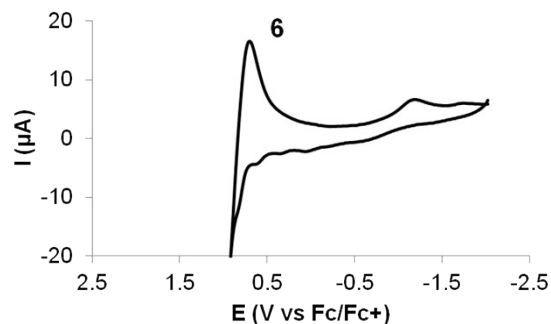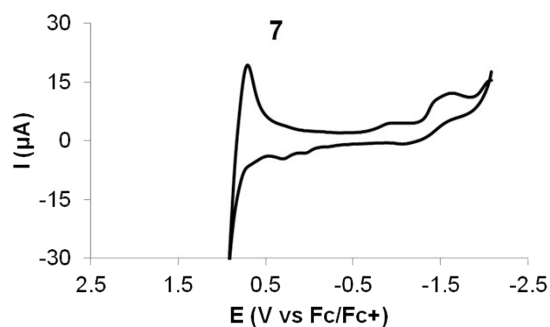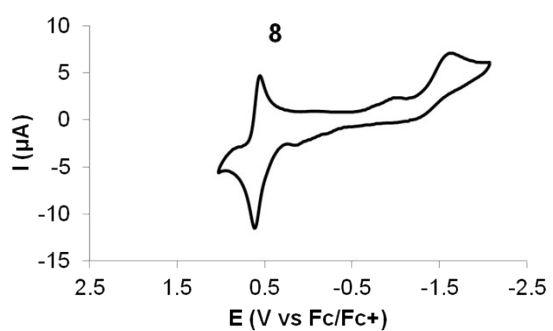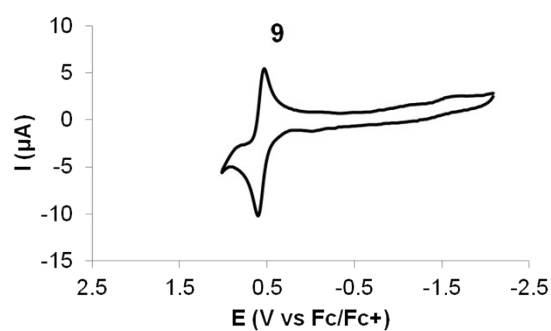

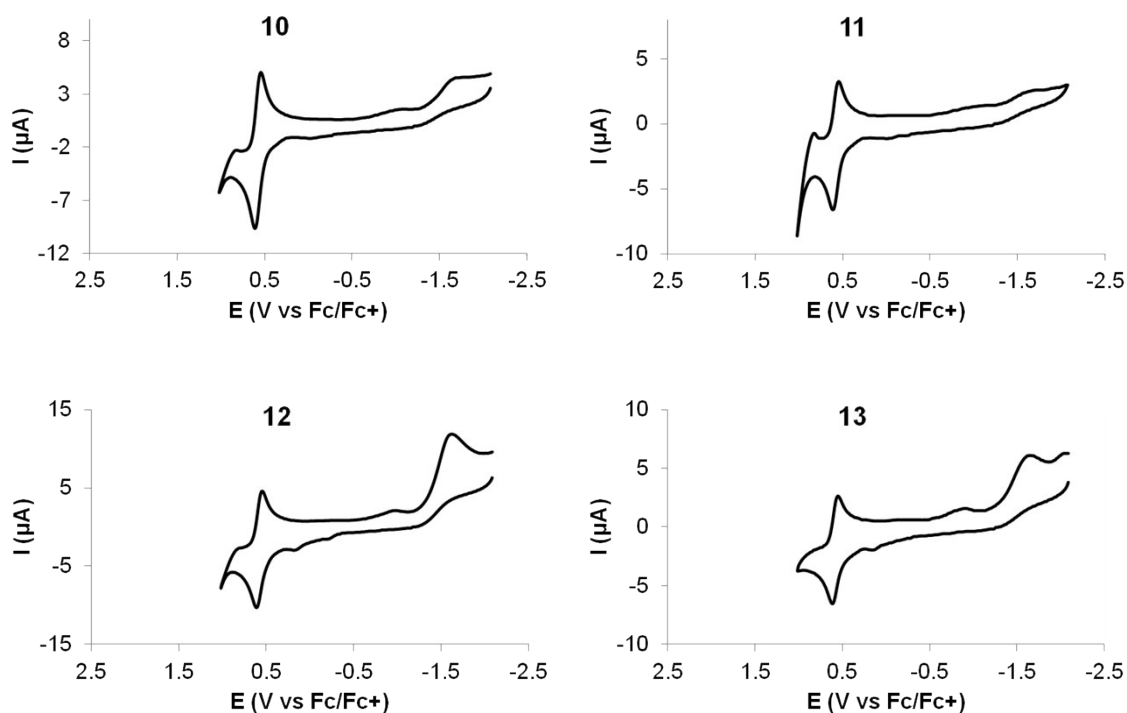

**Figure S48** Cyclic voltammograms of compounds **3-13** ( $10^{-3}$  M) in acetonitrile/0.1 M tetra-n-butylammonium hexafluorophosphate (TBAPF<sub>6</sub>)

**Table S2** Electrochemical data for compounds **3-13**

| compound | $E_{pc}$ (V) | $E_{pa}$ (V) | $E^{o'}$ (V) | compound  | $E_{pc}$ (V) | $E_{pa}$ (V) | $E^{o'}$ (V) |
|----------|--------------|--------------|--------------|-----------|--------------|--------------|--------------|
| <b>3</b> | 0.798        | -            | -            | <b>8</b>  | 0.573        | 0.591        | 0.582        |
| <b>4</b> | 0.697        | -            | -            | <b>9</b>  | 0.541        | 0.587        | 0.564        |
| <b>5</b> | 0.689        | -            | -            | <b>10</b> | 0.545        | 0.591        | 0.568        |
| <b>6</b> | 0.710        | -            | -            | <b>11</b> | 0.569        | 0.623        | 0.596        |
| <b>7</b> | 0.711        | -            | -            | <b>12</b> | 0.551        | 0.625        | 0.588        |
|          |              |              |              | <b>13</b> | 0.554        | 0.582        | 0.568        |

Cyclic voltammograms were obtained at 298 K using a standard three electrode cell and electrochemical analyzer BAS 100B from Bioanalytical systems. The sample concentration were  $10^{-3}$  M in acetonitrile (ACN) in the presence of 0.1 M tetra-n-butylammonium hexafluorophosphate (TBAPF<sub>6</sub>) as a supporting electrolyte. A gold working electrode (planar circular area 0.79 mm<sup>2</sup>), a silver wire pseudo-reference electrode, a platinum wire auxiliary electrode, and ferrocene internal

standard were used in the measurement. The working electrode was polished with 0.05  $\mu\text{m}$  alumina on a polish pad. The electrode was rinsed with ethanol after each polishing and dried with a Kimwipe. The scan rate for all measurement was 100 mV/s. Approximated formal potentials for a reversible redox couples ( $E^{\circ'} = [E_{\text{pc}} + E_{\text{pa}}]/2$ ), and  $E_{\text{pc}}$  in case of irreversible process, were all referenced against ferrocene/ferrocenium couple ( $\text{Fc}/\text{Fc}^+$ ).<sup>1</sup>

## Reference

1. R. R. Gagné, C. A. Koval, and G. C. Lisensky, *Inorg. Chem.*, 1980, 19, 2854-2855.
